1 Dryland cropping system, weed  
2 communities, and disease status modulate  
3 the effect of climate conditions on wheat  
4 soil bacterial communities.

---

5 Running title: agricultural soil bacteria and climate

6

7 Suzanne Lynn Ishaq<sup>a,b\*#</sup>, Tim Seipel<sup>b</sup>, Carl Yeoman<sup>c</sup>, Fabian D. Menalled<sup>b#</sup>

8

9 <sup>a</sup> University of Oregon, Biology and the Built Environment Center, Eugene, OR, 97403

10 <sup>b</sup> Montana State University, Department of Land Resources and Environmental Sciences,  
11 Bozeman MT, 59717

12 <sup>c</sup> Montana State University, Department of Animal and Range Sciences, Bozeman MT,  
13 59717

14 \*Current affiliation: University of Maine, School of Food and Agriculture, Orono, ME  
15 04469,

16 **Emails:**

17 SI: [sue.ishaq@maine.edu](mailto:sue.ishaq@maine.edu)

18 TS: [timothy.seipel@montana.edu](mailto:timothy.seipel@montana.edu)

19 CJY: [carl.yeoman@montana.edu](mailto:carl.yeoman@montana.edu)

20 FM: [Menalled@montana.edu](mailto:Menalled@montana.edu)

21

22 **#Corresponding authors:**

23 Suzanne Ishaq, University of Maine, School of Food and Agriculture, 5735 Hitchner Hall,  
24 Room 130A, Orono, ME 04469, [sue.ishaq@maine.edu](mailto:sue.ishaq@maine.edu)

25

26 Fabian Menalled, Montana State University, Department of Land Resources and  
27 Environmental Sciences, 720 Leon Johnson Hall, Bozeman MT, 59717,  
28 [Menalled@montana.edu](mailto:Menalled@montana.edu)

29

30 **Keywords:** 16S rRNA gene, climate change, Illumina MiSeq, conventional, organic,  
31 tillage, grazing, wheat streak mosaic virus

32

33

34 **ABSTRACT**

35 Little knowledge exists on whether soil bacteria are impacted by cropping  
36 systems and disease status in current and predicted climate scenarios. We assessed the  
37 impact of soil moisture and temperature, weed communities, and disease status on soil  
38 bacterial communities across three cropping systems: conventional no-till (CNT) utilizing  
39 synthetic pesticides and herbicides, 2) USDA-certified tilled organic (OT), and 3) USDA-  
40 certified organic with sheep grazing (OG). Sampling date within the growing season, and  
41 associated soil temperature and moisture, exerted the greatest effect on bacterial  
42 communities, followed by cropping system, Wheat streak mosaic virus (WSMV)  
43 infection status, and weed community. Soil temperature was negatively associated with  
44 bacterial richness and evenness, while soil moisture was positively associated with  
45 bacterial richness and evenness. Both soil temperature and moisture altered soil bacterial  
46 community similarity. Inoculation with WSMV altered community similarity, and there  
47 was a date x virus interaction on bacterial richness in CNT and OT systems, as well as an  
48 interaction between WSMV x climate. In May and July, cropping system altered the  
49 effect of climate change on the bacterial community composition in hotter, and hotter and  
50 drier conditions not treated with WSMV, as compared to ambient conditions. In areas  
51 treated with WSMV, there were interactions between cropping system, sampling date,  
52 and climate conditions, indicating the effect of multiple stressors on bacterial  
53 communities in soil. Overall, this study indicates that predicted climate modifications as  
54 well as biological stressors play a fundamental role in the impact of cropping systems on  
55 soil bacterial communities.

56

57 **IMPORTANCE**

58 Climate change is affecting global moisture and temperature patterns and its  
59 impacts are predicted to worsen over time, posing progressively larger threats on food  
60 production. In the Northern Great Plains of the United States, climate change is  
61 forecasted to increase temperature and decrease precipitation during the summer, and is  
62 expected to negatively affect cereal crop production and pest management. In this study,  
63 temperature, soil moisture, weed communities, and disease status had interactive effects  
64 with cropping system on bacterial communities. As local climates continue to shift, so  
65 too will the dynamics of above- and below-ground associated bio-diversity which will  
66 impact food production and the need for more sustainable practices.

67

## 68 INTRODUCTION

69 Climate change affects soil moisture content and temperature which, in turn,  
70 impacts: crop production and nutritional value (1–4); pest abundance, dynamics, and  
71 management (4–7); as well as overall ecosystem resiliency (8). Determining how climate  
72 change modifies multitrophic interactions between crops, weeds, pathogens, and soil  
73 microbial communities is complex (9), yet critical, as crop production relies on healthy  
74 soil and microbially-mediated nutrient cycling (10, 11). Microbial  $\alpha$ -diversity in soil is  
75 linked to plant growth stage (12). Low microbial  $\alpha$ -diversity in soil is associated with  
76 impeded plant growth, and early senescence of *Arabidopsis thaliana* (13). With the  
77 knowledge that climate change will fundamentally change the dynamics of agricultural  
78 ecosystems, we must increase our understanding of the mechanisms driving biological  
79 and environment stress to secure the sustainability of agricultural production, (1, 14, 15).

80 The Northern Great Plains of the United States is a major global cereal-producing  
81 region where the effects of climate change are already being felt (16, 17). Over the next  
82 30 years, mean temperature is predicted to increase by 2.5 – 3.3°C in this region (17, 18).  
83 Soil microbial community structure and function may be altered due to their temperature  
84 sensitivity (19–21). Coupled with predicted decreases in summer precipitation, hotter  
85 and drier conditions during the growing season will result in crop stress (17) which has  
86 the potential to further alter soil microbial communities. In periods of drought, microbial  
87 diversity is reduced (22, 23) as is their ability to cycle soil nitrogen (24). Drought can  
88 also cause plants to prioritize relationships with fungi over bacteria, reducing the transfer  
89 of nutrients and contributing to the crash of the bacterial community (25, 26). Further, as  
90 climate change alters the composition of plant communities and their nutrient content (27,



91 28), the composition of plant litter and residues is altered. This change in soil inputs, in  
92 turn, modifies plant-microbe relationships (29–31) and reduces the available nutrients  
93 recycled into soil (22, 30).

94 Climate change is also predicted to worsen the effects of plant pathogens,  
95 including *Wheat streak mosaic virus* (WSMV; genus *Tritimovirus*), either by altering the  
96 dynamics of vector transfer or by decreased plant resistance to infection (7, 32). WSMV  
97 is transmitted by wheat curl mites (*Aceria tosichella*), occurs across the North American  
98 Great Plains, and can make plants more susceptible to the effects of climate change by  
99 hindering root development and water uptake (33). To our knowledge, no study has  
100 formally assessed the potential link between WSMV infection and plant-, rhizosphere-, or  
101 root-associated microbial communities. While un-explored, it is possible that the WSMV  
102 viral infections which alters root structure or function, and thus the capacity for plants to  
103 interact with soil microbiota.

104 In industrial (contemporarily referred to as conventional) cropping systems,  
105 management approaches focused on maximizing production are based on regular  
106 applications of synthetic inputs in the form of fertilizers and pesticides (34). In recent  
107 years, shifted consumer demands and new market opportunities have developed organic  
108 production into a major agricultural, economic, and cultural force (35, 36). However,  
109 organic cropping systems rely heavily on tillage for weed management and cover-crop  
110 termination. Due to the negative consequences that tilling has on the physical, chemical,  
111 and biological properties of soils in the semi-arid ecosystems that dominate large sections  
112 of the Northern Great Plains, there is a growing interest among farmers and researchers to  
113 reduce soil disturbance practices in organic systems (37–39). In this context, the

114 integration of crop and livestock production has been proposed as a sustainable approach  
115 to terminate cover crops, manage crop residues, and control weeds while reduce tillage  
116 intensity (40–42), yet very few studies exist on the impact of integrated livestock  
117 management on soil quality or microbial communities (23) or disease resistance.

118 Differences among cropping systems affect plant communities, including species'  
119 abundance, composition, and growth (43, 44) which, in turn, modifies microbial  
120 communities in the rhizosphere (23, 45, 46). Although previous studies have evaluated  
121 the role of microbial communities in crop yields and crop-weed competition (47), fewer  
122 explore the extent to which root-associated bacteria are impacted by cropping systems,  
123 weeds, and plant disease in current and predicted climate scenarios. The aim of our study  
124 was to assess changes in soil bacterial communities due to warmer and drier climate  
125 conditions and the presence of WSMV across contrasting cropping systems and their  
126 associated weed communities. We hypothesized that: 1) bacterial community richness  
127 and evenness would be reduced by climate or WSMV infection; 2) cropping systems that  
128 promote bacterial richness would be more resistant to alterations from climate and  
129 WSMV infection; and 3) more diverse bacterial communities would have a more stable  
130 bacterial community membership over the growing season and in response to increased  
131 soil temperature, decreased precipitation, and WSMV.

132

133

## 134 **RESULTS**

### 135 *Bacterial diversity and evenness*

136 Soil temperature during the growing season (Fig S1) was a strong driver of  
137 bacterial species' richness (Table 1); with fewer bacterial OTUs (97% cutoff) observed in  
138 soil during hotter temperatures (Fig 1A). Increased soil temperature reduced the  
139 evenness of bacterial species' (Table 1). Hotter soil temperatures were negatively  
140 associated with the presence or relative abundance of bacterial taxa that were  
141 significantly important features in the model (Figure 1B). The most abundant of those  
142 taxa included members of *Blastococcus*, Bacillales, Micromonosporaceae,  
143 Intrasporangiaceae, *Sphingomonas*, Microbacteriaceae, and *Streptomyces* (Fig 1B).

144 Soil moisture during the growing season (Fig S2) positively impacted total  
145 bacterial species' richness (Fig 2A, Table 1) and evenness (Table 1), though not as  
146 strongly as temperature did. Across all samples, soil temperature and soil moisture were  
147 not correlated with each other (lmer,  $p > 0.05$ ; Fig S3). Soil moisture impacted the  
148 relative abundance of bacterial species in different ways (Fig 2B). For example,  
149 *Aeromicrobium* were more abundant at low soil moisture levels, *Sphingomonas* were  
150 more abundant at high moisture, and *Phenylobacterium* were most abundant at moderate  
151 levels of soil moisture (Fig 2B).

152 Cropping system interacted with climate treatment to affect bacterial richness and  
153 evenness (Fig 3; Table 1). Bacterial richness at ambient conditions peaked in early June  
154 for all three cropping systems, while richness in both hotter, and hotter and drier  
155 conditions peaked in late June in the CNT and OG systems (Fig 3A). Bacterial richness

156 in OG subplots was affected by soil temperature (lmer, Estimate = 35,  $F = 2.997$ ,  $p =$   
157 0.003), and moisture (lmer, Estimate = 6,  $F = 2.203$ ,  $p = 0.03$ ).

158 Inoculation with WSMV resulted in 6 CNT positive samples with mean infection  
159 rate within subplots of 4.4%, 9 OG positives with mean infection rate of 13.3%, and 7 OT  
160 positives with mean infection rate of 3.2% (Table S1). Overall, inoculation with WSMV  
161 had no effect on bacterial species' richness or evenness (Fig 3; Table 1). When  
162 comparing CNT and OT subplots, there was a date x virus interaction on bacterial  
163 richness (lmer,  $F = 2.6792$ ,  $p = 0.039$ ). OT subplots at the end of July that had been  
164 inoculated with WSMV showed reduced bacterial richness (lmer,  $F = 2.019$ ,  $p = 0.046$ ),  
165 as did all hotter treatments in July treated with WSMV ( $F = 3.046$ ,  $p = 0.003$ ) and hotter  
166 OG treatments inoculated with WSMV in April ( $F = 2.039$ ,  $p = 0.044$ ), May ( $F = 2.088$   $p$   
167 = 0.039), and late June ( $F = 2.192$ ,  $p = 0.03$ ). Weed species' diversity, and percent  
168 coverage or biomass, did not alter bacterial richness across all subplots (lm,  $p > 0.05$ ).

169

#### 170 *Bacterial community stability*

171 Soil temperature impacted bacterial community similarity (Table 2). Hotter soil  
172 temperatures were associated with increased variation in bacterial community  
173 heterogeneity and dispersion (betadisper,  $F = 3.3579$ ,  $p < 0.001$ ), i.e. in warmer  
174 temperatures the bacterial communities were more dissimilar across and within a  
175 treatment group. Soil moisture also altered soil bacterial community similarity (Table 2),  
176 but did not affect the amount of variation (heterogeneity) within bacterial communities  
177 (betadisper,  $p > 0.05$ ). Soil moisture did not have an effect on homogeneity when  
178 considering healthy and WSMV subplots separately, to account for the effect of WSMV

179 on plants' abilities to uptake water. Soil bacterial community similarity was impacted by  
180 the interaction of cropping system and climate (Table 2).

181 Here, stability (interpreted as no significant difference in bacterial  $\beta$ -diversity)  
182 was similar between ambient and treatment subplots over time. Lower OTU richness  
183 correlated with a higher similarity between ambient and manipulated hotter and drier  
184 subplots (lm,  $F = 1291$ ,  $p < 0.001$ ), and this was most evident early and late in the  
185 growing season (Fig 4). The temporal stability of a bacterial community against climate  
186 change was not associated with a lower fold difference in OTUs between ambient and  
187 hotter, and ambient and hotter and drier subplots (Fig 5). While the most stable soil  
188 communities did have more bacterial OTUs, a loss of OTUs was not necessarily  
189 associated with having lower community similarity (Fig 5).

190 When comparing bacterial communities in response to climate conditions,  
191 cropping system varied how stable bacterial communities remained at different periods in  
192 the growing season (Fig 6; Table 3). In May, the bacterial communities in hotter OG  
193 samples were less stable compared to the ambient OG samples, as compared to hotter  
194 CNT and OT, which were more stable compared to their respective bacterial  
195 communities under ambient conditions (Fig 6; Table 3). In July, the bacterial  
196 communities in the hotter OT subplots were most stable \, than the hotter CNT or OT  
197 subplots and their respective ambient conditions (Fig 6; Table 3). For bacterial  
198 communities in hotter and drier subplots as compared to ambient subplots, communities  
199 in OT subplots showed the most stability, followed by OG samples, and CNT were least  
200 stable (most dissimilar) compared to the respective ambient conditions (Fig 6; Table 3).

201           Neither WSMV inoculation nor rate of infection (Table S3) within subplots  
202   created a definable bacterial community (random forest, data not shown); although  
203   WSMV inoculation was negatively associated with a species of *Cellulomonas*, as well as  
204   with Actinobacteria clade 480-2 (Fig S4). However, WSMV inoculation significantly  
205   affected soil bacterial community similarity (Table 2). Moreover, there was an  
206   interaction of WSMV and climate change (Table 2), which was modulated by cropping  
207   system (Fig 7; Table 3).

208           When comparing the change in bacterial communities between ambient  
209   conditions and hotter, or hotter and drier climate conditions, cropping system modulated  
210   how stable bacterial communities remained in subplots which had been treated with  
211   WSMV. In assessing similarity between bacterial communities between ambient and  
212   climate conditions, CNT and OT subplots treated with WSMV were significantly  
213   different (ANOVA,  $p < 0.001$  Tukey) from their non-infected counterparts, indicating  
214   that disease status altered the ability of the community to remain stable (i.e. resistance)  
215   under changing climate. However, OG subplots did not differ between WSMV-treated  
216   and untreated subplots (ANOVA,  $p > 0.05$  Tukey) in terms of the similarity between  
217   ambient and climate-conditioned soil.

218           WSMV made it more difficult for bacterial communities to remain stable under  
219   climate conditions, across the growing season, and between cropping systems (Fig 7;  
220   Table 3). When comparing ambient to hotter conditions in subplots treated with WSMV,  
221   in April, CNT subplots were more stable than OG or OT; in early June, OG was more  
222   stable than OT; in late June, CNT and OG were more stable than OT; and in late July,  
223   CNT subplots were most stable, followed by OT, and then OG subplots (Fig 7, Table 3).

224 Comparing hotter and drier to ambient conditions in WSMV-treated subplots, in April,  
225 CNT subplots were more stable than OG or OT; in late June, CNT and OG were more  
226 stable than OT; and in late July, CNT was again more stable than OG or OT (Fig 6; Table  
227 3).

228 Weed communities in the organic systems were more diverse than the CNT  
229 subplots, though OG and CNT had similar relative species abundance (28). Climate  
230 conditions had minor impacts on weed communities (28). Weed species' diversity, as  
231 well as percent or biomass from subplots negatively impacted the similarity between  
232 ambient and climate-treated subplots across the growing season (Fig S5), including weed  
233 diversity (lm,  $F = 79.153$ ,  $p < 0.001$ ) and percent coverage ( $F = 26.516$ ,  $p < 0.001$ ) the  
234 prior fall on Oct 25, 2015, diversity ( $F = 25.637$ ,  $p < 0.001$ ) and coverage ( $F = 119.78$ ,  $p$   
235  $< 0.001$ ) early in the growing season on Apr 8, 2016, diversity on 6/14/2016 ( $F = 68.888$ ,  
236  $p < 0.001$ ), and weed biomass on June 29, 2016 ( $F = 30.807$ ,  $p < 0.001$ ).

237 Individual weed species were associated with membership of the soil bacterial  
238 community (Table 4) including *Asperugo procumbens*, *Bromus tectorum*, *Capsella*  
239 *brusa-pastoris*, *Chenopodium album*, *Cirsium arvense*, *Descurainia sofia*, *Galium*  
240 *aparine*, *Lactuca serriola*, *Lamium amplexicaule*, *Malva neglecta*, *Monolepsis*  
241 *nuttaliana*, *Poa annua*, *Solanum triflorum*, *Taraxacum officinale*, *Thlaspi arvense*,  
242 *Tragopogon dubious*, and *Trifolium pretense*. Of these, three weed species had definable  
243 effects on bacterial community structure (Fig S6;  $p < 0.05$ ). Winter annuals, *Bromus*  
244 *tectorum* cover in mid-June (Fig S6A), as well as cover of *Capsella bursa-pastoris* (Fig  
245 S6B) and *Descurainia sofia* (Fig S6C) in the previous fall had a predictable impact on the  
246 rhizosphere community. *Bromus tectorum* had a U-shaped relationship with bacterial

247 relative abundance, while *C. bursa-pastoris* and *D. sofia* showed more of a positive  
248 correlation. *Capsella bursa-pastoris* cover in subplots associated with an increase in  
249 *Rubrobacter*, *Nocardioides*, *Illumatobacter*, the family-level clade FFCH13075 in the  
250 order Solirubrobacterales, and others (Fig S6B). *Descurainia sofia* coverage of subplots  
251 associated with an increase in the KD4-96 clade in the Chloroflexi phylum, FFCH13075,  
252 *Blastococcus*, *Nocardioides*, *Oryzihumus*, and others (Fig S6C).

253

254

## 255 **DISCUSSION**

256 This study evaluated the effects of climate conditions, WSMV inoculation,  
257 cropping system and associated *in situ* weed communities on wheat soil bacterial  
258 communities over the course of a growing season. We hypothesized that 1) bacterial  
259 community richness and evenness would be reduced by climate or WSMV infection, 2)  
260 cropping systems which promote bacterial richness would be more resistant to alterations  
261 from climate and WSMV infection, and 3) more diverse bacterial communities would  
262 have a more stable bacterial community membership over the growing season and in  
263 response to increased soil temperature, decreased precipitation, and WSMV. In summary,  
264 sampling date within the growing season, soil temperature, and soil moisture exerted the  
265 greatest effect on soil bacterial communities, followed by cropping system, WSMV  
266 infection status, and weed community characteristics.

267 Changes in precipitation and soil moisture, atmospheric gas concentration, soil  
268 salinity, and soil temperature can affect bacterial diversity (19, 20, 48). In particular, soil  
269 temperature can be a stronger driver of bacterial diversity and functionality than soil



270 moisture (49). Even after weeks of warmer temperatures, soils microbiota do not appear  
271 to develop functional resistance to the heat and maintain stable communities (49), yet  
272 soils which experience frequent wet-dry cycles, such as grassland soils, host microbial  
273 communities which remain more stable under drought conditions (50). Physical or  
274 chemical disturbance can further prevent a stable soil community which is adapted to  
275 warmer temperatures from forming (51). In this study, and in accordance previous  
276 studies (52, 53), soil temperature was found to be a stronger driver of bacterial species'  
277 diversity and abundance than soil moisture. This may reflect the more complex  
278 interaction between plants, microorganisms, and soil conditions, as soil moisture can  
279 somewhat stabilize soil temperature (54). Plant foliation, which increases with air  
280 temperature, in turn shades soil and can buffer further increases in soil temperature (54),  
281 thus better supporting microbial communities.

282 Cropping systems are known to be associated with particular soil microbial  
283 communities (23, 46, 55). In particular, the use of plant- or manure-based fertilizer can  
284 increase microbial diversity while chemical-based fertilizers select for acid-tolerant  
285 species (46, 56, 57), leading to the trend of organic systems to harbor more diverse  
286 microbial communities than conventional (industrial) ones (56, 58, 59). Further, tillage  
287 and herbicides reduce microbial diversity (60, 61). Soil microbial  $\alpha$ -diversity has been  
288 used as a topical application to rescue plants from drought, salt stress, or disease (62–64)  
289 and may be used to remediate soils after chemical or physical disruption (65–68). Thus,  
290 management practices which promote microbial diversity have the potential to be used as  
291 an *in situ* method to moderate the effect of stressors such as climate change, pathogens,  
292 or weeds (47, 55).

293 We previously assessed the impact of these cropping systems over the course of  
294 the growing season (23) and observed that under ambient conditions, cropping system did  
295 not alter bacterial richness or evenness but did affect  $\beta$ -diversity. In particular, organic  
296 tilled subplots contained more putative nitrogen-fixing bacterial genera (23). In the  
297 present study, the bacterial community in all cropping systems changed over the course  
298 of the growing season, as well as in response to increased soil temperature or decreased  
299 soil moisture. However, the interaction between cropping systems and climate conditions,  
300 which was not identical across systems. The peak in bacterial richness in CNT and OG  
301 systems was delayed in the hotter and hotter and drier conditions as compared to their  
302 respective ambient subplots. From observations, wheat in these systems developed more  
303 slowly than in OT subplots. The peak in bacterial richness is likely tied to peak growth  
304 and development of wheat, when plant-bacterial nutrient exchange is greatest. In OT  
305 subplots, the earlier peak and subsequent drop in bacterial richness may be associated  
306 with an more advanced growth stage and earlier senescence (13). Cropping system  
307 affected the stability of bacterial communities when comparing ambient to climate-  
308 treated conditions, with the conventional no-till system remaining more stable than the  
309 organic ones. This may reflect the more intense selective pressure exerted by chemical  
310 inputs on the community, and the recruitment of a more resilient microbiota.

311 Cropping system can indirectly alter soil microbial  $\alpha$ -diversity via crop disease  
312 susceptibility. For example, direct nitrogen fertilization can increase WSMV disease  
313 transmission (69). Using livestock grazing to terminate cover crops and control weed  
314 residues can reduce wheat mite populations (70), although this has not been shown to  
315 reduce virus transmission (71). In the present study, there were interactions between

316 WSMV application and soil moisture, soil temperature, and cropping system X soil  
317 moisture, pointing to the importance of multiple concurrent stressors in shaping soil  
318 communities. The effect of different cropping systems on viral infection in crops is  
319 complex (72) and is largely modulated by the extent of crop diversification, crop residue  
320 removal strategy, and pest control (73).

321 As early successional species, agricultural weeds establish quickly in newly-  
322 disturbed soil and sometimes earlier in the growing season than spring or summer crops  
323 (74). In climate change scenarios which predict warmer, wetter springs, and higher  
324 atmospheric CO<sub>2</sub>, the alteration of the local environmental conditions can give weeds a  
325 greater advantage over crops (75). Changing environmental conditions and crop-weed  
326 competition may, in turn, alter the soil microbial community, further making conditions  
327 less favorable for crop germination, growth, and competitive ability (76). As with all  
328 plant species, agricultural weed species associate with particular microbial communities  
329 in their rhizosphere (23, 55, 74, 77). It is generally thought that weed diversity in  
330 agricultural settings could increase microbial diversity in soil, and potentially increase the  
331 functionality and stability of soil microbial communities. In this study site, ambient  
332 subplots were previously showed to have weak positive correlations between weed  
333 diversity and soil bacterial richness (23). In the present study, weed diversity or biomass  
334 did not alter soil bacterial richness or evenness, although bacterial  $\beta$ -diversity was  
335 affected, and weed diversity was inversely related to the stability of bacterial  
336 communities in response to climate treatment. This may reflect the temporary increases  
337 in bacterial richness during periods of weed growth which are not sustained during the

338 hottest part of the season when bacterial communities are more susceptible to temperature  
339 and moisture stress.

340 Environmental conditions or disease status on bacterial communities had  
341 interactive effects with cropping system. This has implications for soil bacterial  
342 communities and plant performance (78), both within the growing season and in  
343 successive plantings, as the legacy of these altered bacterial communities persists (8). As  
344 local climates continue to shift, so too will the dynamics of above- and below-ground  
345 diversity which will impact food production and the need for more sustainable practices  
346 (5, 16, 18).

347

## 348 **MATERIALS AND METHODS**

### 349 *Experimental Design*

350 This study was conducted in 2015 and 2016 at an agricultural field experiment  
351 that was implemented since July 2012 at the Montana State University Fort Ellis  
352 Research and Teaching Center, Bozeman, MT (45.652664056 N -110.97249611 W,  
353 elevation 1500 m a.s.l.) to test production of three dryland cropping systems using a 5-  
354 year crop rotation. The Fort Ellis site is a Blackmore silt loam soil type (a fine-silty,  
355 mixed, superactive, frigid Typic Arguistoll) with a consistent ratio of 1 part sand, 2 parts  
356 silt, 1 part clay, by weight, at 0 to 4% slopes (79). The monthly air temperature in  
357 Bozeman in 2016 was higher than historic maximum and minimums from 1981 – 2010,  
358 and the mean monthly precipitation [Table S2, reproduced from (23)] was lower by 18  
359 mm in May, 16 mm in June, and 14 mm in July (80).

360           The cropping systems at the studied site consisted of 1) conventional no-till  
361 system (CNT), in which synthetic inputs were used in the form of fertilizers, herbicides,  
362 and fungicides, 2) USDA-certified tilled organic (OT), and 3) USDA-certified organic  
363 with grazing (OG), which integrates sheep grazing to terminate cover crops and manage  
364 weeds, with the overall goal of reducing tillage intensity in organic production. Chemical  
365 inputs utilized in the CNT system included 2,4-D, bromoxynil, dicamba, fluroxypyr,  
366 glyphosate, MCPA, pinoxaden, and urea for winter wheat rotations [see Tables 2.7 and  
367 2.8 in (81)]. The organic plots began the organic transition process in July 2012, and  
368 completed in 2015. In the OT system, tillage was performed with a chisel plow, tandem  
369 disk, or field cultivator, as needed for to control weeds, prepare the seedbed, and to  
370 incorporate cover crops and crop residues. Weed control was enhanced with a rotary  
371 harrow. In the OG system, targeted sheep grazing was used to reduce tillage intensity for  
372 pre-seeding and post-harvest weed control and to terminate the cover crops, with duration  
373 and intensity of grazing based on weed biomass (5). Grazing was minimally  
374 supplemented with tillage, based on soil conditions and weed pressure. For all systems,  
375 seeding was done with a low-disturbance no-till double-disk seeder. Outside of normal  
376 farm management activities, soil disturbance and compaction were minimized during  
377 sampling procedures. Further details of the management practices, both historical and at  
378 the time of experimentation, can be found elsewhere (5, 43, 81).

379           Each system was replicated three times (i.e. blocks) with cropping systems (75 x  
380 90 m) as the main plots, each of which was further divided into 5 split plots (13 x 90 m),  
381 with a 2m fallow buffer in between. Split plots were each following a 5 yr rotation which  
382 consisted of: year 1 – safflower (*Carthamus tinctorius* L.) under-sown to yellow sweet

383 clover (*Melilotus officinalis* (L.) Lam.), year 2 – sweet clover cover crop, year 3 – winter  
384 wheat (*Triticum aestivum* L.), year 4 – lentil (*Lens culinaris* Medik.), and year 5 – winter  
385 wheat (5).

386 Within each the year 3 – winter wheat fields, subplots (1 m diameter) were  
387 randomly established to assess the impact of climate conditions and disease status on  
388 wheat soil bacteria across cropping systems. Two subplots were marked with flags and  
389 used as control or ambient climate conditions (ambient), two subplots were enclosed with  
390 an open-top chamber (OTC, hotter) made from 18 in high plastic that reflected heat back  
391 on the subplot to increase air temperature and soil temperature by 1 - 2° C (82), and two  
392 subplots were enclosed with OTCs and partially covered with rain-out shelters (OTC-  
393 ROS, hotter and drier) which reduced rainfall by 50% using transparent polyurethane  
394 [Fig S7, similar to (83)]. For each of the three climate treatments, one of the subplots  
395 was randomly inoculated with WSMV (see below).

396

#### 397 *Wheat streak mosaic virus inoculation and data collection*

398 Following previous work (84), prior to the WSMV inoculations, spring wheat  
399 (variety Chouteau) was grown in the greenhouse in flat trays (30 x 10 cm), where plants  
400 were maintained under a 16-h photoperiod of sunlight supplemented with mercury  
401 vapour lamps ( $165 \text{ uE m}^{-2} \text{ s}^{-1}$ ) at 10°C/25°C day/night. When the wheat was at Feekes  
402 stage 4 - 6, an inoculum of WSMV was created from the ‘Conrad’ isolate line (85).  
403 Infected wheat was harvested from the greenhouse and frozen for 1 - 2 days until use. To  
404 create the WSMV inoculum, 300 g of infected wheat clippings were ground to reduce  
405 particle size using a food processor, then blended with buffer (3.2 L of de-ionized water +

406 600 ml of 5X PBS, pH 7.2) until smooth. Slurry was filtered through cheesecloth to  
407 remove particulate matter which would clog the spray hose, and refrigerated for up to 1 h  
408 until use. Immediately prior to use, 2 g carborundum (ground glass) was added per 3.78  
409 L of slurry as an abrasive to slightly injure wheat enough for the virus to infect. Slurry  
410 was sprayed onto subplots using an air compressor (275 kilo Pascals) travelling at a rate  
411 of 0.5 m/s and sprayed at a height of 20 cm above the canopy. Control subplots were  
412 sprayed with water in which 2 g carborundum was added per 3.78 L (no-template  
413 control). Spraying occurred the last week of April, one week after the first soil sampling  
414 date (April 21) and two weeks prior to the second sampling date (May 12).

415 Infection of WSMV in subplots was evaluated in July by using an indirect ELISA,  
416 with 10 leaves sampled from each subplot and assessed separately (Ito et al. 2012).  
417 Within a plate, every 10th well contained a negative control (i.e., sample from healthy  
418 wheat plant) to reduce potential bias in values of optical density caused by position of  
419 samples. The mean and standard deviation of the negative control on each plate were  
420 calculated. Samples above three standard deviations were considered infected with  
421 WSMV (Miller et al. 2014). ELISA results are provided in Table S1.

422

#### 423 *Crop and weed evaluations*

424 Percent coverage of weeds in subplots was assessed visually in October 2015,  
425 April 2016, and June 2016. Aboveground biomass of all weed species within sampled  
426 areas was harvested by hand in late June 2016. Within each 0.75 m<sup>2</sup> subplot, weed  
427 biomass was cut at ground level and separated by species. The individual biomass of each  
428 species was dried for 2 weeks at 55° C, and weighed (28). Wheat biomass was harvested

429 from sampled areas by hand on July 25, 2016, once the crop had completely senesced and  
430 ripened. The two center rows (75 cm each) of wheat in the subplot were harvested, for a  
431 total of 1.5 row meters. All the aboveground biomass was harvested, dried for 1 week at  
432 55° C and threshed to determine biomass and grain yields (28)

433

#### 434 *Soil assessment*

435 Soil moisture was measured weekly using gypsum blocks buried at 5 cm below  
436 ground (86). Soil temperature was measured with buried iButtons (Maxim Integrated),  
437 with data obtained every four hours between April 14, 2016 (one week prior to the first  
438 sampling) and July 25, 2016 (final sampling date). In each subplot, three cores were  
439 taken from around wheat plants to a depth of 15 cm, then homogenized into one  
440 composite sample, which was used for bacterial community sampling (stored at -20°C)  
441 and nutrient analysis (stored at 4°C). Soil cores were obtained from all 54 subplots at  
442 five time-points over the growing season: April 21 before the WSMV inoculations were  
443 applied; May 12, one week post-WSMV infection; June 1, three weeks post-WSMV  
444 infection; June 22, six weeks post-WSMV infection; and July 25<sup>th</sup>, 10 weeks post-  
445 WSMV infection and immediately prior to wheat harvesting. Additional soil was  
446 collected at wheat harvest for nutrient analysis, presented in Table S3 (Agvise  
447 Laboratories, Northwood, North Dakota, US).

448 DNA extraction from soil samples, library preparation, sequencing, and sequence  
449 analysis protocols were as previously described (23). Illumina MiSeq (Montana State  
450 University, Bozeman, MT) was used to sequence the V3-V4 region of the 16S rRNA  
451 gene, using primers 341F (5'-CCTACGGGAGGCAGCAG-3') and 806R (5'-



452 GGACTACHVGGGTWTCTAAT-3') (87). Sequencing output data can be found in the  
453 Sequence Read Archive (SRA) at NCBI under BioProject PRJNA383161  
454 (<https://www.ncbi.nlm.nih.gov/bioproject/?term=PRJNA383161>).

455 Linear mixed effects models and distance based redundancy models (vegan) (88),  
456 random forest with permutation (89, 90), PERMANOVA (adonis) (91), and ggplot2 (92)  
457 were used in the R statistical package (93). Linear mixed models used cropping system,  
458 soil moisture and soil temperature on the day of sampling, and WSMV application as  
459 random effects. Sampling date and subplot identity nested with block were included to  
460 control for repeated sampling. Some variables were aliased in the distance-based  
461 redundancy analysis and therefore were removed from the model: *Capsella brusa-*  
462 *pastoris*, *Cirsium arvense*, *Galium aparine*, and *Tragopogon dubious* biomass on June 29,  
463 2016; *Chenopodium album*, *Lamium amplexicaule*, *Malva neglecta*, *Poa annua*, and  
464 *Solanum triflorum* coverage October 25, 2015; *C. arvense*, *T. dubious*, and *Trifolium*  
465 *pretense* coverage April 8, 2016; and *Chenopodium album* and *Tragopogon dubious*  
466 coverage June 14, 2016. Plant coverage has been shown to have a linear correlation with  
467 plant aboveground biomass (94, 95) and, weed senescence may negate the effect on soil  
468 microorganisms (95). Thus, as coverage was measured at multiple timepoints but  
469 biomass only once, coverage was used as a more accurate measure of the weed-soil  
470 microbe relationship with respect to sampling date when coverage and biomass were both  
471 significant.

472 Random forest was performed with 500 trees and 100 permutations. Replicate  
473 block did not affect numerical diversity and was included as a random effect in those  
474 models, but did affect bacterial communities when comparing ambient systems (23), and

475 was included as a fixed effect in those models. Unweighted Jaccard similarity was used  
476 to determine effect of factors on community structure, and tested with PERMANOVA  
477 (adonis), with replicate block as a stratification. When comparing climate to ambient  
478 conditions, we utilized analysis of variance (ANOVA) and Tukey's Honest Significant  
479 Differences to assess the variables determining soil bacterial communities. The  
480 comparison and visualization of ambient to climate conditions was based on R code  
481 developed by Drs. Ashkaan Fahimipour and Roo Vandegrift.

482

### 483 **ACKNOWLEDGEMENTS**

484 The authors would like to thank Kyla Crisp, Madison Nixon, Tessa Scott, Rachel Flowers,  
485 Ali Thornton, and Lazaro Vinola for their assistance maintaining the plots and collecting  
486 samples; Dr. Mary Burrows and Everett Owen for assistance producing Wheat streak  
487 virus; Devon Ragen for sheep maintenance; Drs. Pat Hatfield and Perry Miller for farm  
488 administration; Sarah Olivo for DNA sequencing; and Genna Shaia for provided some  
489 literature review assistance. This work was supported by the USDA NIFA Organic  
490 Transitions (ORG) program (Grant MONB00128), the Montana Agricultural Experiment  
491 Station (project MONB00113), and the National Institute of General Medical Sciences of  
492 the National Institutes of Health (NIH-NIGMS; award number P20GM103474).

493

494

495

### 496 **REFERENCES**

497 1. Myers SS, Zanobetti A, Kloog I, Huybers P, Leakey ADB, Bloom AJ, Carlisle E,

- 498           Dietterich LH, Fitzgerald G, Hasegawa T, Holbrook NM, Nelson RL, Ottman MJ,  
499           Raboy V, Sakai H, Sartor KA, Schwartz J, Seneweera S, Tausz M, Usui Y. 2014.  
500           Increasing CO<sub>2</sub> threatens human nutrition. *Nature* 510:139–142.
- 501    2.    De La Puente LS, Perez PP, Martinez-Carrasco R, Morcuende RM, Del Molino  
502           IMM. 2000. Action of elevated CO<sub>2</sub> and high temperatures on the mineral  
503           chemical composition of two varieties of wheat. *Agrochimica* 44:506.
- 504    3.    Poorter H, Van Berkel Y, Baxter R, Den Hertog J, Dijkstra P, Gifford RM, Griffin  
505           KL, Roumet C, Roy J, Wong SC. 1997. The effect of elevated CO<sub>2</sub> on the  
506           chemical composition and construction costs of leaves of 27 C<sub>3</sub> species. *Plant,*  
507           *Cell Environ* 20:472–482.
- 508    4.    León-Sánchez L, Nicolás E, Goberna M, Prieto I, Maestre FT, Querejeta JI. 2018.  
509           Poor plant performance under simulated climate change is linked to mycorrhizal  
510           responses in a semi-arid shrubland. *J Ecol* 106:960–976.
- 511    5.    Lehnhoff E, Miller Z, Miller P, Johnson S, Scott T, Hatfield P, Menalled F. 2017.  
512           Organic agriculture and the quest for the Holy Grail in water-limited ecosystems:  
513           managing weeds and reducing tillage intensity. *Agriculture* 7:33.
- 514    6.    Caldwell CR, Britz SJ, Mirecki RM. 2005. Effect of temperature, elevated carbon  
515           dioxide, and drought during seed development on the isoflavone content of dwarf  
516           soybean [*Glycine max* (L.) Merrill] grown in controlled environments. *J Agric*  
517           *Food Chem* 53:1125–1129.
- 518    7.    Elad Y, Pertot I. 2014. Climate Change Impacts on Plant Pathogens and Plant  
519           Diseases. *J Crop Improv* 28:99–139.
- 520    8.    Seipel T, Ishaq SL, Menalled FD. 2019. Agroecosystem resilience is modified by

- 521 management system via plant–soil feedbacks. *Basic Appl Ecol* 39:1–9.
- 522 9. Lipper L, Thornton P, Campbell BM, Baedeker T, Braimoh A, Bwalya M, Caron P,  
523 Cattaneo A, Garrity D, Henry K, Hottle R, Jackson L, Jarvis A, Kossam F, Mann  
524 W, McCarthy N, Meybeck A, Neufeldt H, Remington T, Sen PT, Sessa R, Shula R,  
525 Tibu A, Torquebiau EF. 2014. Climate-smart agriculture for food security. *Nat*  
526 *Clim Chang* 4:1068–1072.
- 527 10. van der Putten WH, Bradford MA, Pernilla Brinkman E, van de Voorde TFJ, Veen  
528 GF. 2016. Where, when and how plant-soil feedback matters in a changing world.  
529 *Funct Ecol* 30:1109–1121.
- 530 11. Mariotte P, Mehrabi Z, Bezemer TM, De Deyn GB, Kulmatiski A, Drigo B, Veen  
531 GF (Ciska), van der Heijden MGA, Kardol P. 2018. Plant–soil feedback: bridging  
532 natural and agricultural sciences. *Trends Ecol Evol* 33:129–142.
- 533 12. Edwards JA, Santos-Medellín CM, Liechty ZS, Nguyen B, Lurie E, Eason S,  
534 Phillips G, Sundaresan V. 2018. Compositional shifts in root-associated bacterial  
535 and archaeal microbiota track the plant life cycle in field-grown rice. *PLoS Biol*  
536 16:1–28.
- 537 13. Carvalhais LC, Muzzi F, Tan CH, Hsien-Choo J, Schenk PM. 2013. Plant growth  
538 in *Arabidopsis* is assisted by compost soil-derived microbial communities. *Front*  
539 *Plant Sci* 4.
- 540 14. Tigchelaar M, Battisti DS, Naylor RL, Ray DK. 2018. Future warming increases  
541 probability of globally synchronized maize production shocks. *Proc Natl Acad Sci*  
542 *U S A* 115:6644–6649.
- 543 15. Scheelbeek PFD, Bird FA, Tuomisto HL, Green R, Harris FB, Joy EJM, Chalabi Z,

- 544 Allen E, Haines A, Dangour AD. 2018. Effect of environmental changes on  
545 vegetable and legume yields and nutritional quality. *Proc Natl Acad Sci U S A*  
546 115:6804–6809.
- 547 16. Power TM, Power DS. 2016. The impact of climate change on Montana’s  
548 agriculture economy. Montana Farmer’s Union.
- 549 17. Whitlock C, Cross WF, Maxwell B, Silverman N, Wade AA. 2017. 2017 Montana  
550 Climate Assessment. Bozeman, MT.
- 551 18. EPA. 2016. What Climate Change Means for Montana: EPA 430-F-16-028.
- 552 19. Alster CJ, Koyama A, Johnson NG, Wallenstein MD, von Fischer JC. 2016.  
553 Temperature sensitivity of soil microbial communities: An application of  
554 macromolecular rate theory to microbial respiration. *J Geophys Res*  
555 *Biogeosciences* 121:1420–1433.
- 556 20. Barcenas-Moreno G, Gomez-Brandon M, Rousk J, Baath E. 2009. Adaptation of  
557 soil microbial communities to temperature: comparison of fungi and bacteria in a  
558 laboratory experiment. *Glob Chang Biol* 15:2950–2957.
- 559 21. Biederbeck VO, Campbell CA. 1973. Soil microbial activity as influenced by  
560 temperature trends and fluctuations. *Can J Soil Sci* 53:363–376.
- 561 22. Sayer EJ, Oliver AE, Fridley JD, Askew AP, Mills RTE, Grime JP. 2017. Links  
562 between soil microbial communities and plant traits in a species-rich grassland  
563 under long-term climate change. *Ecol Evol* 7:855–862.
- 564 23. Ishaq SL, Seipel T, Yeoman CJ, Menalled FD. 2020. Soil bacterial communities of  
565 wheat vary across the growing season and among dryland farming systems.  
566 *Geoderma* 358:113989.

- 567 24. Gschwendtner S, Tejedor J, Bimuellner C, Dannenmann M, Knabner IK, Schloter  
568 M. 2014. Climate change induces shifts in abundance and activity pattern of  
569 bacteria and archaea catalyzing major transformation steps in nitrogen turnover in  
570 a soil from a Mid-European beech forest. *PLoS One* 9:e114278.
- 571 25. de Vries FT, Griffiths RI, Bailey M, Craig H, Girlanda M, Gweon HS, Hallin S,  
572 Kaisermann A, Keith AM, Kretzschmar M, Lemanceau P, Lumini E, Mason KE,  
573 Oliver A, Ostle N, Prosser JI, Thion C, Thomson B, Bardgett RD. 2018. Soil  
574 bacterial networks are less stable under drought than fungal networks. *Nat*  
575 *Commun* 9:3033.
- 576 26. Fuchslueger L, Bahn M, Fritz K, Hasibeder R, Richter A. 2014. Experimental  
577 drought reduces the transfer of recently fixed plant carbon to soil microbes and  
578 alters the bacterial community composition in a mountain meadow. *New Phytol*  
579 201:916–927.
- 580 27. Seipel T, Ishaq Pellegrini S, Menalled F. 2018. The effect of climate conditions on  
581 weed competition and wheat yields in the Northern Great Plains. *Proceedings of the*  
582 *Western Society of Weed Science*. Western Society of Weed Science, Garden  
583 Grove, CA.
- 584 28. Seipel T, Ishaq SL, Menalled FD. 2020. Weed communities and wheat yield are  
585 modified by cropping systems and climate conditions. *Weed Res* In review.
- 586 29. Rofner C, Peter H, Catalán N, Drewes F, Sommaruga R, Pérez MT. 2017. Climate-  
587 related changes of soil characteristics affect bacterial community composition and  
588 function of high altitude and latitude lakes. *Glob Chang Biol* 23:2331–2344.
- 589 30. Bragazza L, Parisod J, Buttler A, Bardgett RD. 2013. Biogeochemical plant-soil

- 590           microbe feedback in response to climate warming in peatlands. *Nat Clim Chang*  
591           3:273–277.
- 592   31.    Classen AT, Sundqvist MK, Henning JA, Newman GS, Moore JAM, Cregger MA,  
593           Moorhead LC, Patterson CM. 2015. Direct and indirect effects of climate change  
594           on soil microbial and soil microbial-plant interactions: What lies ahead? *Ecosphere*  
595           6:art130.
- 596   32.    Hadi BAR, Langham MAC, Osborne L, Tilmon KJ. 2011. Wheat streak mosaic  
597           virus on wheat: biology and management. *J Integr Pest Manag* 1:1–5.
- 598   33.    Price JA, Workneh F, Evett SR, Jones DC. 2010. Effects of wheat streak mosaic  
599           virus on root development and water-use efficiency of hard red winter wheat. *Plant*  
600           Dis 94:766–700.
- 601   34.    Smith RG, Menalled FD, Robertson GP. 2007. Temporal yield variability under  
602           conventional and alternative management systems. *Agron J* 99:1629–1634.
- 603   35.    USDA ERS - Organic Market Overview. USDA Econ Res Serv.
- 604   36.    Constance DH. 2010. Sustainable agriculture in the United States: A critical  
605           examination of a contested process. *Sustainability* 2:48–72.
- 606   37.    Carr P. 2017. Guest Editorial: Conservation Tillage for Organic Farming.  
607           *Agriculture* 7:19.
- 608   38.    Shabeb MSA, Younis MAM, Hezayen FF, Nour-Eldein MA. 2010. Production of  
609           cellulase in low-cost medium by *Bacillus subtilis* KO strain. *World Appl Sci J*  
610           8:35–42.
- 611   39.    Roger-Estrade J, Anger C, Bertrand M, Richard G. 2010. Tillage and soil ecology:  
612           Partners for sustainable agriculture. *Soil Tillage Res* 111:33–40.

- 613 40. Miller ZJ, Menalled FD, Sainju UM, Lenssen AW, Hatfield PG. 2015. Integrating  
614 sheep grazing into cereal-based crop rotations: spring wheat yields and weed  
615 communities. *Agronomy* 107:104–112.
- 616 41. McKenzie SC, Goosey HB, O’Neill KM, Menalled FD. 2016. Integration of sheep  
617 grazing for cover crop termination into market gardens: Agronomic consequences  
618 of an ecologically based management strategy. *Renew Agric Food Syst* 74:1–14.
- 619 42. MacLaren C, Storkey J, Strauss J, Swanepoel P, Dehnen-Schmutz K. 2019.  
620 Livestock in diverse cropping systems improve weed management and sustain  
621 yields whilst reducing inputs. *J Appl Ecol* 56:144–156.
- 622 43. Barroso J, Miller ZJ, Lehnhoff EA, Hatfield PG, Menalled FD. 2015. Impacts of  
623 cropping system and management practices on the assembly of weed communities.  
624 *Weed Res* 55:426–435.
- 625 44. Adhikari S, Menalled F. 2018. Impacts of dryland farm management systems on  
626 weeds and ground beetles (Carabidae) in the Northern Great Plains. *Sustainability*  
627 10:2146.
- 628 45. Philippot L, Raaijmakers JM, Lemanceau P, van der Putten WH. 2013. Going back  
629 to the roots: the microbial ecology of the rhizosphere. *Nat Rev Microbiol* 11:789–  
630 799.
- 631 46. Ishaq SL. 2017. Plant-microbial interactions in agriculture and the use of farming  
632 systems to improve diversity and productivity. *AIMS Microbiol* 3:335–353.
- 633 47. Johnson SP, Miller Z, Lehnhoff E, Miller P, Menalled FD. 2017. Cropping  
634 systems modify the impacts of biotic plant-soil feedbacks on wheat (*Triticum*  
635 *aestivum* L.) growth and competitive ability. *Weed Res* 57:6–15.



- 636 48. Biederbeck VO, Zentner RP, Campbell CA. 2005. Soil microbial populations and  
637 activities as influenced by legume green fallow in a semiarid climate. *Soil Biol*  
638 *Biochem* 37:1775–1784.
- 639 49. Bérard A, Bouchet T, Sévenier G, Pablo AL, Gros R. 2011. Resilience of soil  
640 microbial communities impacted by severe drought and high temperature in the  
641 context of Mediterranean heat waves. *Eur J Soil Biol* 47:333–342.
- 642 50. Fierer N, Schimel JP, Holden PA. 2003. Influence of Drying-Rewetting Frequency  
643 on Soil Bacterial Community Structure. *Microb Ecol* 45:63–71.
- 644 51. Kuan HL, Fenwick C, Glover LA, Griffiths BS, Ritz K. 2006. Functional  
645 resilience of microbial communities from perturbed upland grassland soils to  
646 further persistent or transient stresses. *Soil Biol Biochem* 38:2300–2306.
- 647 52. Nottingham AT, Fierer N, Turner BL, Whitaker J, Ostle NJ, McNamara NP,  
648 Bardgett RD, Leff JW, Salinas N, Silman MR, Kruuk LEB, Meir P. 2018.  
649 Microbes follow Humboldt: temperature drives plant and soil microbial diversity  
650 patterns from the Amazon to the Andes. *Ecology* 99:2455–2466.
- 651 53. Heinze J, Gensch S, Weber E, Joshi J. 2016. Soil temperature modifies effects of  
652 soil biota on plant growth. *J Plant Ecol* 10:rtw097.
- 653 54. Lozano-Parra J, Pulido M, Lozano-Fondón C, Schnabel S. 2018. How do soil  
654 moisture and vegetation covers influence soil temperature in drylands of  
655 Mediterranean regions? *Water (Switzerland)* 10:1–14.
- 656 55. Ishaq SL, Johnson SP, Miller ZJ, Lehnhoff EA, Olivo S, Yeoman CJ, Menalled  
657 FD. 2017. Impact of cropping systems, soil inoculum, and plant species identity on  
658 soil bacterial community structure. *Microb Ecol* 73:417–434.

- 659 56. Hiel M-P, Barbieux S, Pierreux J, Olivier C, Lobet G, Roisin C, Garré S, Colinet G,  
660 Bodson B, Dumont B. 2018. Impact of crop residue management on crop  
661 production and soil chemistry after seven years of crop rotation in temperate  
662 climate, loamy soils. *PeerJ* 6:e4836.
- 663 57. Lupatini M, Korthals GW, de Hollander M, Janssens TKS, Kuramae EE. 2016.  
664 Soil microbiome is more heterogeneous in organic than in conventional farming  
665 system. *Front Microbiol* 7:2064.
- 666 58. Hartmann M, Frey B, Mayer J, Mäder P, Widmer F. 2015. Distinct soil microbial  
667 diversity under long-term organic and conventional farming. *ISME J* 9:1177–1194.
- 668 59. Orr CH, James A, Leifert C, Cooper JM, Cummings SP. 2011. Diversity and  
669 activity of free-living nitrogen-fixing bacteria and total bacteria in organic and  
670 conventionally managed soils. *Appl Environ Microbiol* 77:911–9.
- 671 60. McGonigle TP, Evans DG, Miller MH. 1990. Effect of degree of soil disturbance  
672 on mycorrhizal colonization and phosphorus absorption by maize in growth  
673 chamber and field experiments. *New Phytol* 116:629–636.
- 674 61. Drijber RA, Doran JW, Parkhurst AM, Lyon DJ. 2000. Changes in soil microbial  
675 community structure with tillage under long-term wheat-fallow management. *Soil  
676 Biol Biochem* 32:1419–1430.
- 677 62. Clark JS, Campbell JH, Grizzle H, Acosta-Martinez V, Zak JC. 2009. Soil  
678 microbial community response to drought and precipitation variability in the  
679 Chihuahuan Desert. *Microb Ecol* 57:248–260.
- 680 63. Santhanam R, Luu VT, Weinhold A, Goldberg J, Oh Y, Baldwin IT. 2005. Native  
681 root-associated bacteria rescue a plant from a sudden-wilt disease that emerged

- 682 during continuous cropping. Proc Natl Acad Sci USA 112:E5013–E5020.
- 683 64. Azizul M, Omine K. 2013. Bioremediation of agricultural land damaged by  
684 tsunami, p. . *In* Chamy, R (ed.), *Biodegradation of Hazardous and Special Products*.  
685 InTech.
- 686 65. Antonious GF. 2012. On-farm bioremediation of dimethazone and trifluralin  
687 residues in runoff water from an agricultural field. *J Environ Sci Heal Part B*  
688 47:608–621.
- 689 66. Bernardino J, Bernardette A, Ramirez-Sandoval M, Domnguez-Oje D. 2012.  
690 Biodegradation and bioremediation of organic pesticides, p. . *In* Sounararajan, RP  
691 (ed.), *Pesticides - Recent Trends in Pesticide Residue Assay*. InTech.
- 692 67. Frazar C. 2000. The bioremediation and phytoremediation of pesticide-  
693 contaminated sites. Washington, DC.
- 694 68. Singh DK. 2008. Biodegradation and bioremediation of pesticide in soil: concept,  
695 method and recent developments. *Indian J Microbiol* 48:35–40.
- 696 69. Miller ZJ, Lehnhoff EA, Menalled FD, Burrows M. 2015. Effects of soil nitrogen  
697 and atmospheric carbon dioxide on Wheat streak mosaic virus and its vector  
698 (*Aceria tosichella* Kiefer). *Plant Dis* 99:1803–1807.
- 699 70. Umina PA, Schiffer M, Parker P, Hoffmann AA. 2016. Distribution and influence  
700 of grazing on wheat curl mites (*Aceria tosichella* Keifer) within a wheat field. *J*  
701 *Appl Entomol* 140:426–433.
- 702 71. Ranabhat NB, Burrows ME, Miller ZJ, Lehnhoff EA, Menalled FD. 2015. Impact  
703 of cover crop termination methods on diseases of wheat and lentil  
704 *American Phytopathological Society and APS Pacific Division Joint meeting*. Pasadena, CA.

- 705 72. Meynard J-M, Dore T, Lucas P. 2003. Agronomic approach: cropping systems and  
706 plant diseases. *Plant Biol Pathol* 326:37–46.
- 707 73. Nicaise V. 2014. Crop immunity against viruses: outcomes and future challenges.  
708 *Front Plant Sci* 5:660.
- 709 74. Trognitz F, Hackl E, Widhalm S, Sessitsch A. 2016. The role of plant–microbiome  
710 interactions in weed establishment and control. *FEMS Microbiol Ecol* 92:fiw138.
- 711 75. Peters K, Breitsameter L, Gerowitt B. 2014. Impact of climate change on weeds in  
712 agriculture: a review. *Agron Sustain Dev* 34:707–721.
- 713 76. Smith RG, Mortensen DA, Ryan MR. 2010. A new hypothesis for the functional  
714 role of diversity in mediating resource pools and weed-crop competition in  
715 agroecosystems. *Weed Res* 50:37–48.
- 716 77. Aguilera AG, Morey S, Gammon M, Jiang M, Ramos S, Kesseli R. 2017. Effect of  
717 plant-soil feedbacks on the growth and competition of *Lactuca* species. *Plant Ecol*  
718 218:359–372.
- 719 78. Brussaard L, de Ruiter PC, Brown GG. 2007. Soil biodiversity for agricultural  
720 sustainability. *Agric Ecosyst Environ* 121:233–244.
- 721 79. Miller ZJ, Menalled FD. 2015. Impact of species identity and phylogenetic  
722 relatedness on biologically-mediated plant-soil feedbacks in a low and a high  
723 intensity agroecosystem. *Plant Soil* 389:171–183.
- 724 80. 2018. PRISM Climate Group. Oregon State Univ.
- 725 81. Johnson SP. 2015. Effects of organic and conventional cropping systems on plant  
726 diversity and plant soil feedbacks. Montana State University - Bozeman, College  
727 of Agriculture.

- 728 82. Norby R, Edwards N, Riggs J, Abner C, Wullschleger S, Gunderson C. 1997.  
729 Temperature-controlled open-top chambers for global change research. *Glob*  
730 *Chang Biol* 3:259–267.
- 731 83. Yahdjian L, Sala O. 2002. A rainout shelter design for intercepting different  
732 amounts of rainfall. *Oecologia* 133:95–101.
- 733 84. Orloff N, Miller ZJ, Menalled FD, Burrows ME, Mangold JM. 2013. Joint effects  
734 of biotic and abiotic stressors on winter wheat suppression of *Bromus tectorum*.  
735 *Weed Res* 53:192–200.
- 736 85. Hall JS, French R, Hein GL, Morris TJ, Stenger DC. 2001. Three distinct  
737 mechanisms facilitate genetic isolation of sympatric Wheat Streak Mosaic Virus  
738 lineages. *Virology* 282:230–236.
- 739 86. Friis Dela B. 2001. Measurement of soil moisture using gypsum blocks. Hørsholm.
- 740 87. Caporaso JG, Lauber CL, Walters WA, Berg-Lyons D, Lozupone CA, Turnbaugh  
741 PJ, Fierer N, Knight R. 2011. Global patterns of 16S rRNA diversity at a depth of  
742 millions of sequences per sample. *Proc Natl Acad Sci USA* 108:4516–4522.
- 743 88. Oksanen J, Blanchet FG, Friendly M, Kindt R, Legendre P, Mcglinn D, Minchin  
744 PR, O'hara RB, Simpson GL, Solymos P, Henry M, Stevens H, Szoecs E,  
745 Maintainer HW. 2018. Community Ecology Package. 2.5-3.
- 746 89. Breiman L, Cutler A, Liaw A, Wiener M. 2018. Breiman and Cutler's random  
747 forests for classification and regression. 4.6.14.
- 748 90. Archer E. 2018. Estimate permutation p-Values for random forest importance  
749 metrics. 2.1.6. Comprehensive R Archive Network (CRAN).
- 750 91. Oksanen J, Kindt FGBR, Legendre P, Minchin PR, O'Hara RB, Simpson GL,

- 751 Solymos P, Stevens MHH, Wagner H. 2012. R community ecology package. 2.0-5.
- 752 92. Wickham H. 2009. ggplot2: Elegant graphics for data analysis, 2nd ed. Springer  
753 Publishing Company.
- 754 93. RCoreTeam. 2018. R: a language and environment for statistical computing. 3.5. R  
755 Foundation for Statistical Computing, Vienna, Austria.
- 756 94. Röttgermann M, Steinlein T, Beyschlag W, Dietz H. 2000. Linear relationships  
757 between aboveground biomass and plant cover in low open herbaceous vegetation.  
758 J Veg Sci 11:145–148.
- 759 95. Prabhakara K, Hively WD, McCarty GW. 2015. Evaluating the relationship  
760 between biomass, percent groundcover and remote sensing indices across six  
761 winter cover crop fields in Maryland, United States. Int J Appl Earth Obs Geoinf  
762 39:88–102.
- 763
- 764

765 **TABLES**

766 **Table 1. Effect of treatment factors and their interactions on observed soil bacterial**  
 767 **richness and evenness.**

768 Richness is measured as bacterial taxa counts and evenness of taxa abundance on a scale  
 769 from 0 to 1 (each species having equal abundance). Comparisons were made using a  
 770 linear mixed effects model accounting for repeated measures of subplots within  
 771 replicated blocks and significance was determined via Type III ANOVA with  
 772 Satterthwaite's approximation.

773

|                      | Observed Richness |         |         | Shannon Evenness |         |         |
|----------------------|-------------------|---------|---------|------------------|---------|---------|
|                      | Sum Sq            | F value | P value | Sum Sq           | F value | P value |
| Cropping System (C)  | 275,240           | 4.53    | 0.012   | 0.051            | 6.28    | 0.002   |
| Soil Temperature (T) | 2,513,973         | 82.82   | <0.001  | 0.080            | 19.64   | <0.001  |
| Soil Moisture (M)    | 1,201,709         | 39.59   | <0.001  | 0.028            | 6.97    | 0.009   |
| WSMV (V)             | 56,697            | 1.87    | 0.173   | 0.001            | 0.14    | 0.708   |
| Date*                | 2,203,758         | 28.71   | <0.001  | 0.104            | 8.6     | <0.001  |
| C:T                  | 442,913           | 7.30    | 0.001   | 0.072            | 8.84    | <0.001  |
| C:M                  | 217,218           | 3.58    | 0.029   | 0.015            | 1.89    | 0.154   |
| T:M                  | 845,614           | 27.86   | <0.001  | 0.025            | 6.07    | 0.014   |
| C:V                  | 110,178           | 1.81    | 0.165   | 0.001            | 0.17    | 0.844   |
| T:V                  | 49,186            | 1.62    | 0.204   | 0.001            | 0.32    | 0.571   |
| M:V                  | 23,029            | 0.76    | 0.385   | 0.001            | 0.17    | 0.683   |
| C:T:M                | 179,405           | 2.96    | 0.054   | 0.010            | 1.24    | 0.293   |
| C:T:V                | 59,576            | 0.98    | 0.376   | 0.008            | 0.96    | 0.385   |
| C:M:V                | 11,219            | 0.18    | 0.831   | 0.002            | 0.21    | 0.812   |
| T:M:V                | 4,413             | 0.15    | 0.703   | 0.001            | 0.37    | 0.546   |
| C:T:M:V              | 8,038             | 0.13    | 0.876   | 0.005            | 0.59    | 0.556   |

774 \*Factor used in simple model.

775 **Table 2. PERMANOVA of treatment factors and their interactions on soil bacterial**  
 776 **communities.**

777 Comparisons were made accounting for repeated measures of subplots and with replicate  
 778 blocks as a stratification. Significance was determined as: < 0.001 = \*\*\*, 0.001 – 0.009  
 779 = \*\*, 0.01 – 0.05 = \*, 0.05 - 0.1 = t (trending).

|                      | Bray-Curtis |                |         |     |
|----------------------|-------------|----------------|---------|-----|
|                      | F           | R <sup>2</sup> | P value |     |
| Cropping system (C)  | 0.88        | 0.007          | 0.001   | *** |
| Soil Moisture (M)    | 3.67        | 0.014          | 0.001   | *** |
| Soil Temperature (T) | 2.00        | 0.007          | 0.004   | **  |
| Virus (V)            | 1.63        | 0.006          | 0.001   | *** |
| Date*                | 5.27        | 0.077          | <0.001  | *** |
| C:M                  | 1.15        | 0.008          | 0.213   |     |
| C:T                  | 1.69        | 0.012          | 0.005   | **  |
| M:T                  | 2.88        | 0.011          | 0.001   | *** |
| C:V                  | 1.00        | 0.007          | 0.189   |     |
| M:V                  | 1.82        | 0.007          | 0.015   | *   |
| T:V                  | 2.93        | 0.011          | 0.001   | *** |
| C:M:T                | 1.03        | 0.008          | 0.411   |     |
| C:M:V                | 1.56        | 0.011          | 0.009   | **  |
| C:T:V                | 1.25        | 0.009          | 0.107   |     |
| M:T:V                | 2.22        | 0.008          | 0.001   | *** |
| C:M:T:V              | 1.25        | 0.009          | 0.093   | t   |

780 \*Factor used in simple model.

781

782

783



784 **Table 3. Effect of climate conditions, cropping system, and sampling date on soil**  
 785 **bacterial community composition.**

786 Unweighted Jaccard was used to calculate bacterial community composition and  
 787 comparisons were made between ambient and hotter, or ambient and hotter and drier  
 788 conditions within each sampling date. Comparisons were tested with analysis of variance  
 789 and P-values adjusted with Tukey’s Honest Significant Differences.

790

| <b>Cropping System</b>              | <b>Date</b> | <b>Virus</b> | <b>Adj. <i>p</i> value</b> |
|-------------------------------------|-------------|--------------|----------------------------|
| <b>Ambient vs. Hotter</b>           |             |              |                            |
| OG-CNT                              | 12-May      | none         | 0.002                      |
| OT-OG                               | 12-May      | none         | 0.001                      |
| OT-CNT                              | 25-Jul      | none         | < 0.001                    |
| OT-OG                               | 25-Jul      | none         | < 0.001                    |
| OG-CNT                              | 21-Apr      | WSMV         | < 0.001                    |
| OT-CNT                              | 21-Apr      | WSMV         | 0.001                      |
| OT-OG                               | 1-Jun       | WSMV         | 0.032                      |
| OT-CNT                              | 22-Jun      | WSMV         | < 0.001                    |
| OT-OG                               | 22-Jun      | WSMV         | 0.007                      |
| OG-CNT                              | 25-Jul      | WSMV         | < 0.001                    |
| OT-CNT                              | 25-Jul      | WSMV         | < 0.001                    |
| OT-OG                               | 25-Jul      | WSMV         | 0.003                      |
| <b>Ambient vs. Hotter and Drier</b> |             |              |                            |
| OG-CNT                              | 25-Jul      | none         | 0.006                      |
| OT-CNT                              | 25-Jul      | none         | < 0.001                    |
| OT-OG                               | 25-Jul      | none         | < 0.001                    |
| OG-CNT                              | 21-Apr      | WSMV         | 0.001                      |
| OT-CNT                              | 21-Apr      | WSMV         | 0.002                      |
| OT-OG                               | 22-Jun      | WSMV         | 0.001                      |
| OT-CNT                              | 22-Jun      | WSMV         | 0.007                      |
| OG-CNT                              | 25-Jul      | WSMV         | < 0.001                    |
| OT-CNT                              | 25-Jul      | WSMV         | < 0.001                    |

791

792

793 **Table 4. PERMANOVA of weed species' identity and percent coverage (cov) on soil**  
 794 **bacterial communities at different times over a growing season.**

795 Comparisons were made accounting for repeated measures of subplots, and with replicate  
 796 blocks as a stratification. Only significant comparisons are shown. Significance was  
 797 determined as: < 0.001 = \*\*\*, 0.001 – 0.009 = \*\*, 0.01 – 0.05 = \*, 0.05 - 0.1 = t  
 798 (trending).

| Weed                                                 | F.Model | R2      | p value | Sig |
|------------------------------------------------------|---------|---------|---------|-----|
| <i>Asperugo procumbens</i> cov Oct 2015              | 1.212   | 0.00474 | 0.047   | *   |
| <i>Bromus tectorum</i> cov Oct 2015                  | 0.819   | 0.0032  | 0.001   | *** |
| <i>Bromus tectorum</i> cov Jun 2016                  | 1.016   | 0.00397 | 0.005   | **  |
| <i>Bromus tectorum</i> biomass late Jun 2016         | 1.1495  | 0.00449 | 0.001   | *** |
| <i>Capsella bursa-pastoris</i> cov Oct 2015          | 0.7862  | 0.00307 | 0.035   | *   |
| <i>Capsella bursa-pastoris</i> cov Apr 2016          | 1.0965  | 0.00429 | 0.001   | *** |
| <i>Capsella brusa-pastoris</i> biomass late Jun 2016 | 1.0236  | 0.004   | 0.001   | *** |
| <i>Chenopodium album</i> cov Apr 2016                | 1.1424  | 0.00447 | 0.05    | *   |
| <i>Chenopodium album</i> cov Jun 2016                | 1.0397  | 0.00407 | 0.001   | *** |
| <i>Cirsium arvense</i> biomass late Jun 2016         | 0.8499  | 0.00332 | 0.03    | *   |
| <i>Descurainia sofia</i> cov Oct 2015                | 0.7804  | 0.00305 | 0.003   | **  |
| <i>Galium aparine</i> cov Apr 2016                   | 0.7757  | 0.00303 | 0.049   | *   |
| <i>Lactuca serriola</i> biomass late Jun 2016        | 0.9691  | 0.00379 | 0.042   | *   |
| <i>Lamium amplexicaule</i> cov Oct 2015              | 1.0349  | 0.00405 | 0.047   | *   |
| <i>Malva neglecta</i> cov Oct 2015                   | 1.129   | 0.00441 | 0.019   | *   |
| <i>Malva neglecta</i> cov Apr 2016                   | 0.6295  | 0.00246 | 0.009   | **  |
| <i>Monolepsis nuttaliana</i> cov Jun 2016            | 0.9573  | 0.00374 | 0.009   | **  |
| <i>Poa annua</i> cov Oct 2015                        | 0.8321  | 0.00325 | 0.001   | *** |
| <i>Poa annua</i> cov Apr 2016                        | 0.7457  | 0.00292 | 0.022   | *   |
| <i>Solanum triflorum</i> cov Oct 2015                | 0.8559  | 0.00335 | 0.044   | *   |
| <i>Taraxacum officinale</i> cov Oct 2015             | 0.8523  | 0.00333 | 0.002   | **  |
| <i>Taraxacum officinale</i> cov Jun 2016             | 0.7226  | 0.00283 | 0.021   | *   |
| <i>Thlaspi arvense</i> cov Apr 2016                  | 1.3834  | 0.00541 | 0.002   | **  |
| <i>Thlaspi arvense</i> cov Jun 2016                  | 0.8235  | 0.00322 | 0.047   | *   |
| <i>Tragopogon dubious</i> biomass late Jun 2016      | 0.799   | 0.00312 | 0.002   | **  |
| <i>Trifolium pratense</i> biomass late Jun 2016      | 0.8271  | 0.00323 | 0.001   | *** |
| <i>Trifolium pratense</i> cov Apr 2016               | 0.813   | 0.00318 | 0.024   | *   |

799  
 800

801

802 **FIGURE LEGENDS**

803 **Fig 1. Effect of soil temperature on soil bacterial communities.** A) Soil temperature  
804 was negatively correlated with soil bacterial richness. B) Relative abundance of soil  
805 bacterial by temperature over the 2016 growing season, selected as important features by  
806 random forest classification. Taxa are arranged by total relative abundance, and only  
807 statistically significant taxa features are shown. Model explained 45% of variance.

808

809 **Fig 2. Effect of soil moisture on soil bacterial communities.** A) Soil moisture (% of  
810 saturation) was positively correlated with soil bacterial richness. B) Relative abundance  
811 of rhizosphere bacteria affected by soil moisture from all subplots across the 2016  
812 growing season, selected as important features by random forest classification ( $p < 0.05$ ).  
813 Model explained 32% of variance.

814

815 **Fig 3. Soil bacterial richness and evenness over the 2016 growing season.** A) species-  
816 level richness and B) species-level evenness by cropping system (conventional no-till,  
817 CNT; organic grazed, OG; organic tilled, OT), climate conditions (ambient, hotter, hotter  
818 and drier), and pathogen infection (Wheat streak mosaic virus, WSMV; no WSMV,  
819 none). Error bars show Standard Error of Means (SEM).

820

821 **Fig 4. Soil bacterial community similarity between ambient and climate-treated**  
822 **subplots correlation with bacterial OTUs.** Cropping systems include conventional no-  
823 till (CNT), organic grazed (OG), and organic tilled (OT).

824

825 **Fig 5. Soil bacterial community similarity against the fold change in number of**  
826 **OTUs in comparing ambient to hotter, and ambient to hotter and drier subplots**  
827 **across the 2016 growing season.** Difference in OTUs is measured as fold change, or  
828 ratio of the OTU abundance in ambient subplots over the OTU abundance in climate  
829 scenario subplots. Viral treatment includes Wheat streak mosaic virus (WSMV) and no-  
830 template control (none). Cropping systems include conventional no-till (CNT), organic  
831 grazed (OG), and organic tilled (OT).

832

833 **Fig 6. Soil bacterial community similarity between ambient and hotter, and ambient**  
834 **and hotter and drier conditions, subplots from three cropping systems across the**  
835 **2016 growing season.** Plots were not treated with Wheat streak mosaic virus.  
836 Significance is provided in Table 4. Cropping systems include conventional no-till (CNT),  
837 organic grazed (OG), and organic tilled (OT).

838

839 **Fig 7 Soil bacterial community similarity between ambient and hotter, and ambient**  
840 **and hotter and drier conditions, in subplots treated with Wheat streak mosaic virus**  
841 **from three cropping systems across the 2016 growing season.** Significance is  
842 provided in Table 4. Cropping systems include conventional no-till (CNT), organic  
843 grazed (OG), and organic tilled (OT).

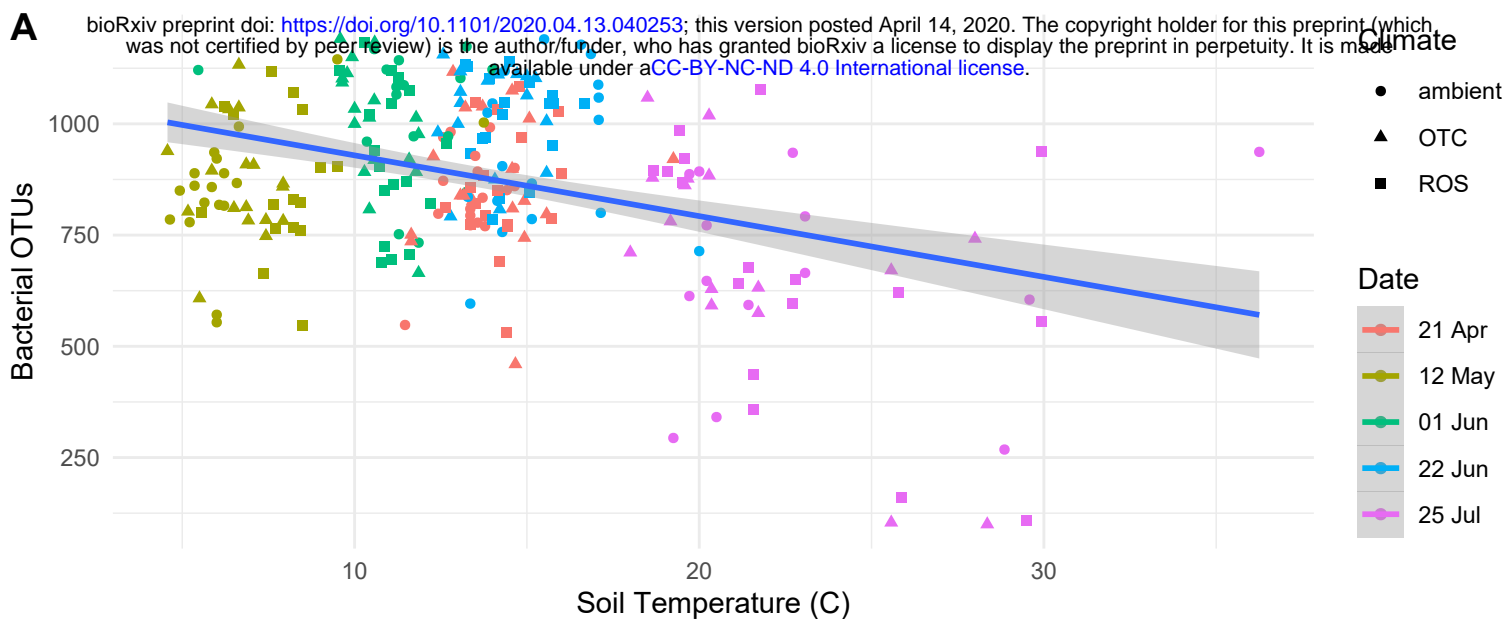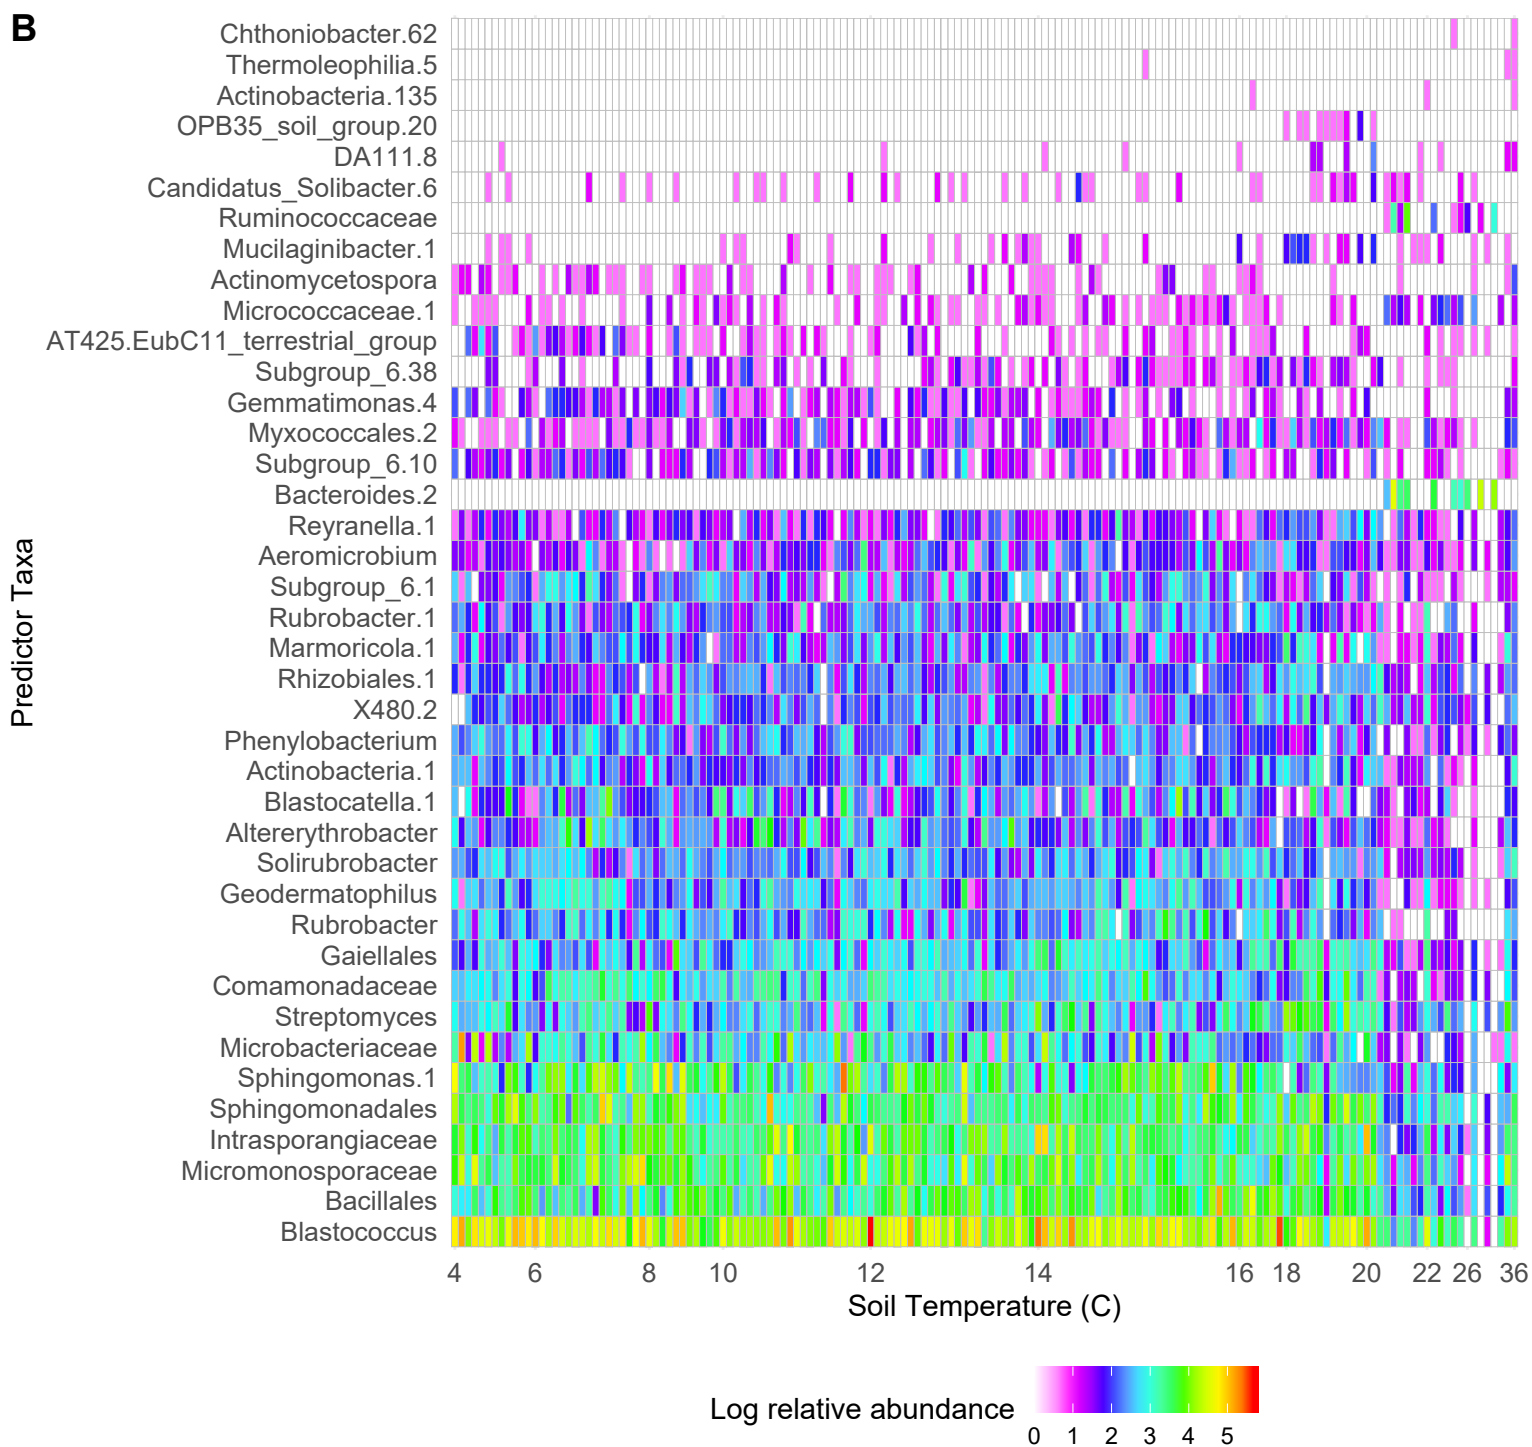

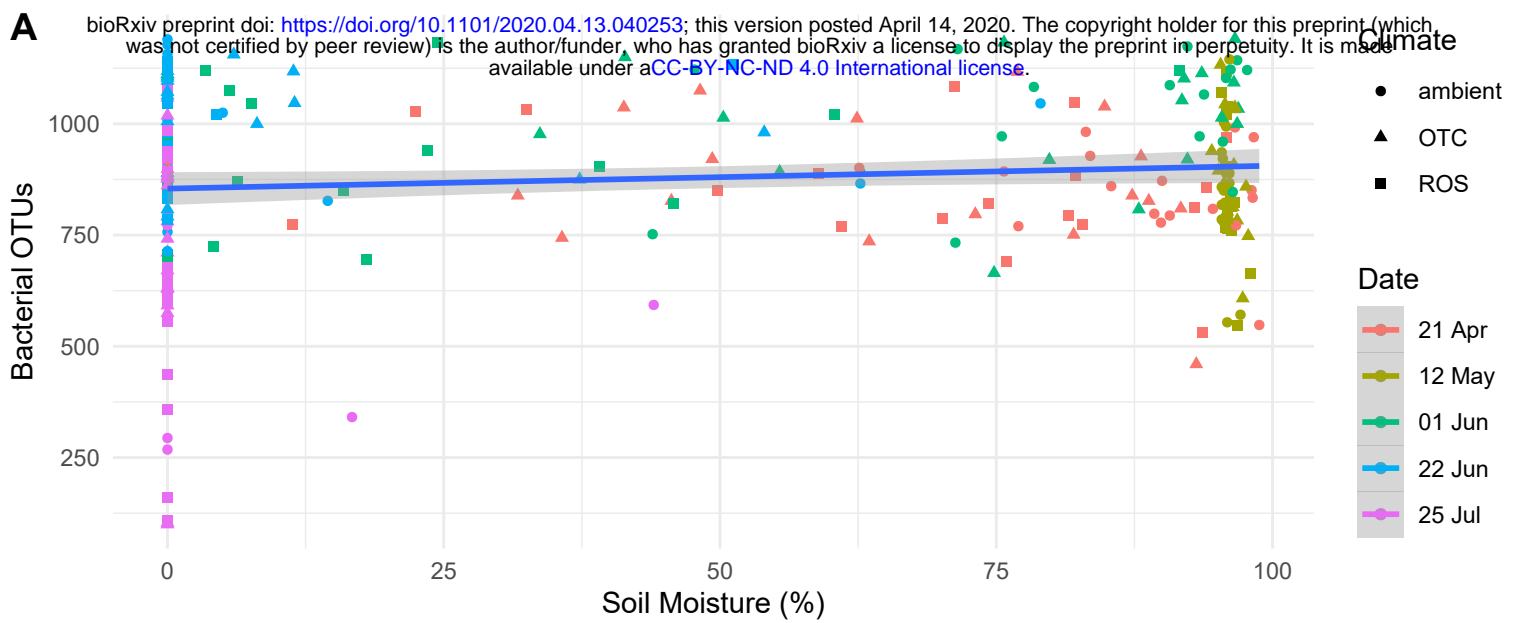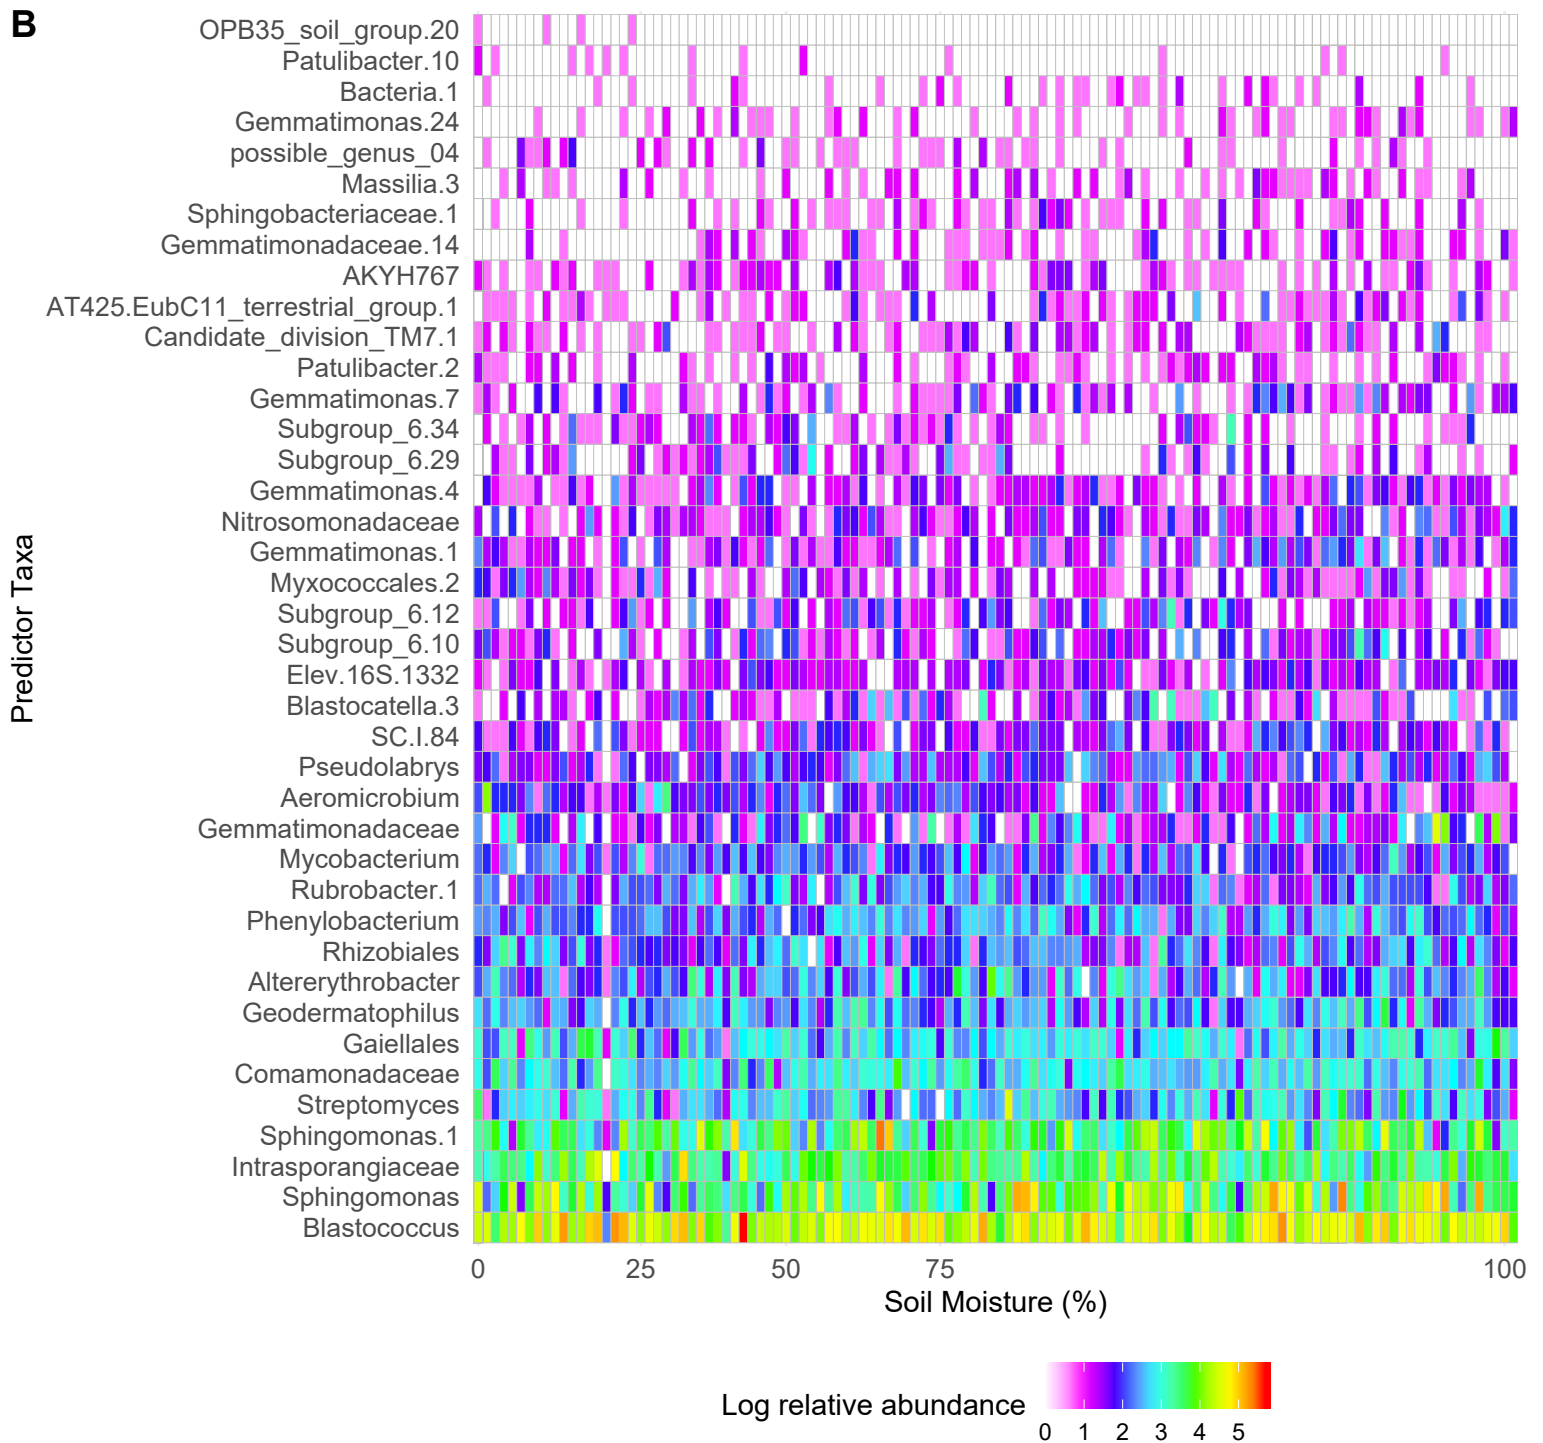

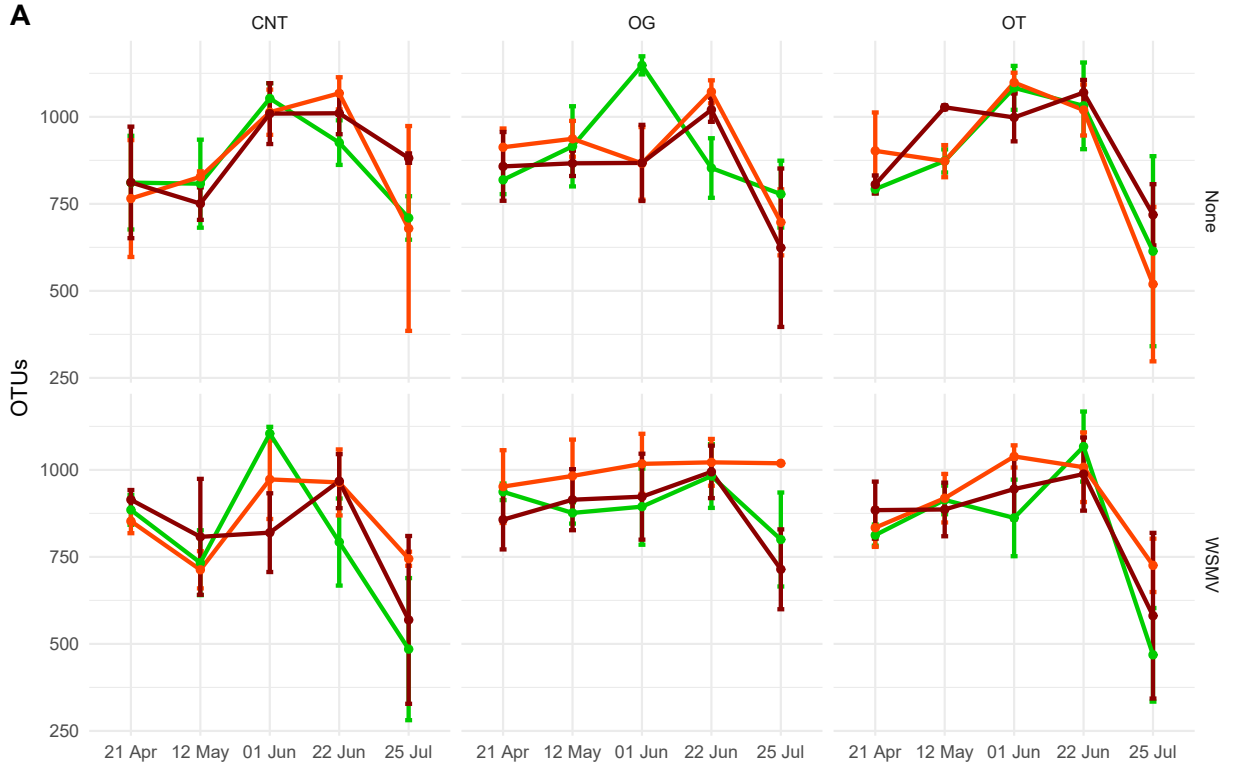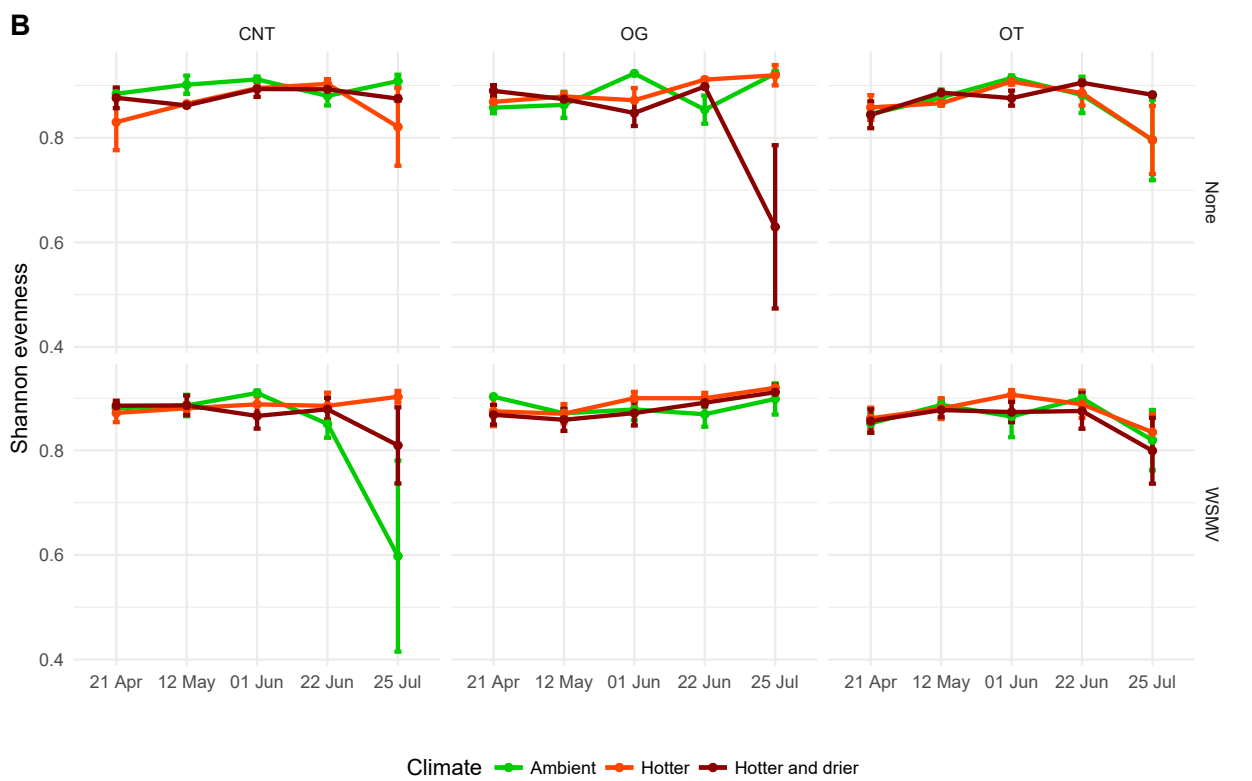



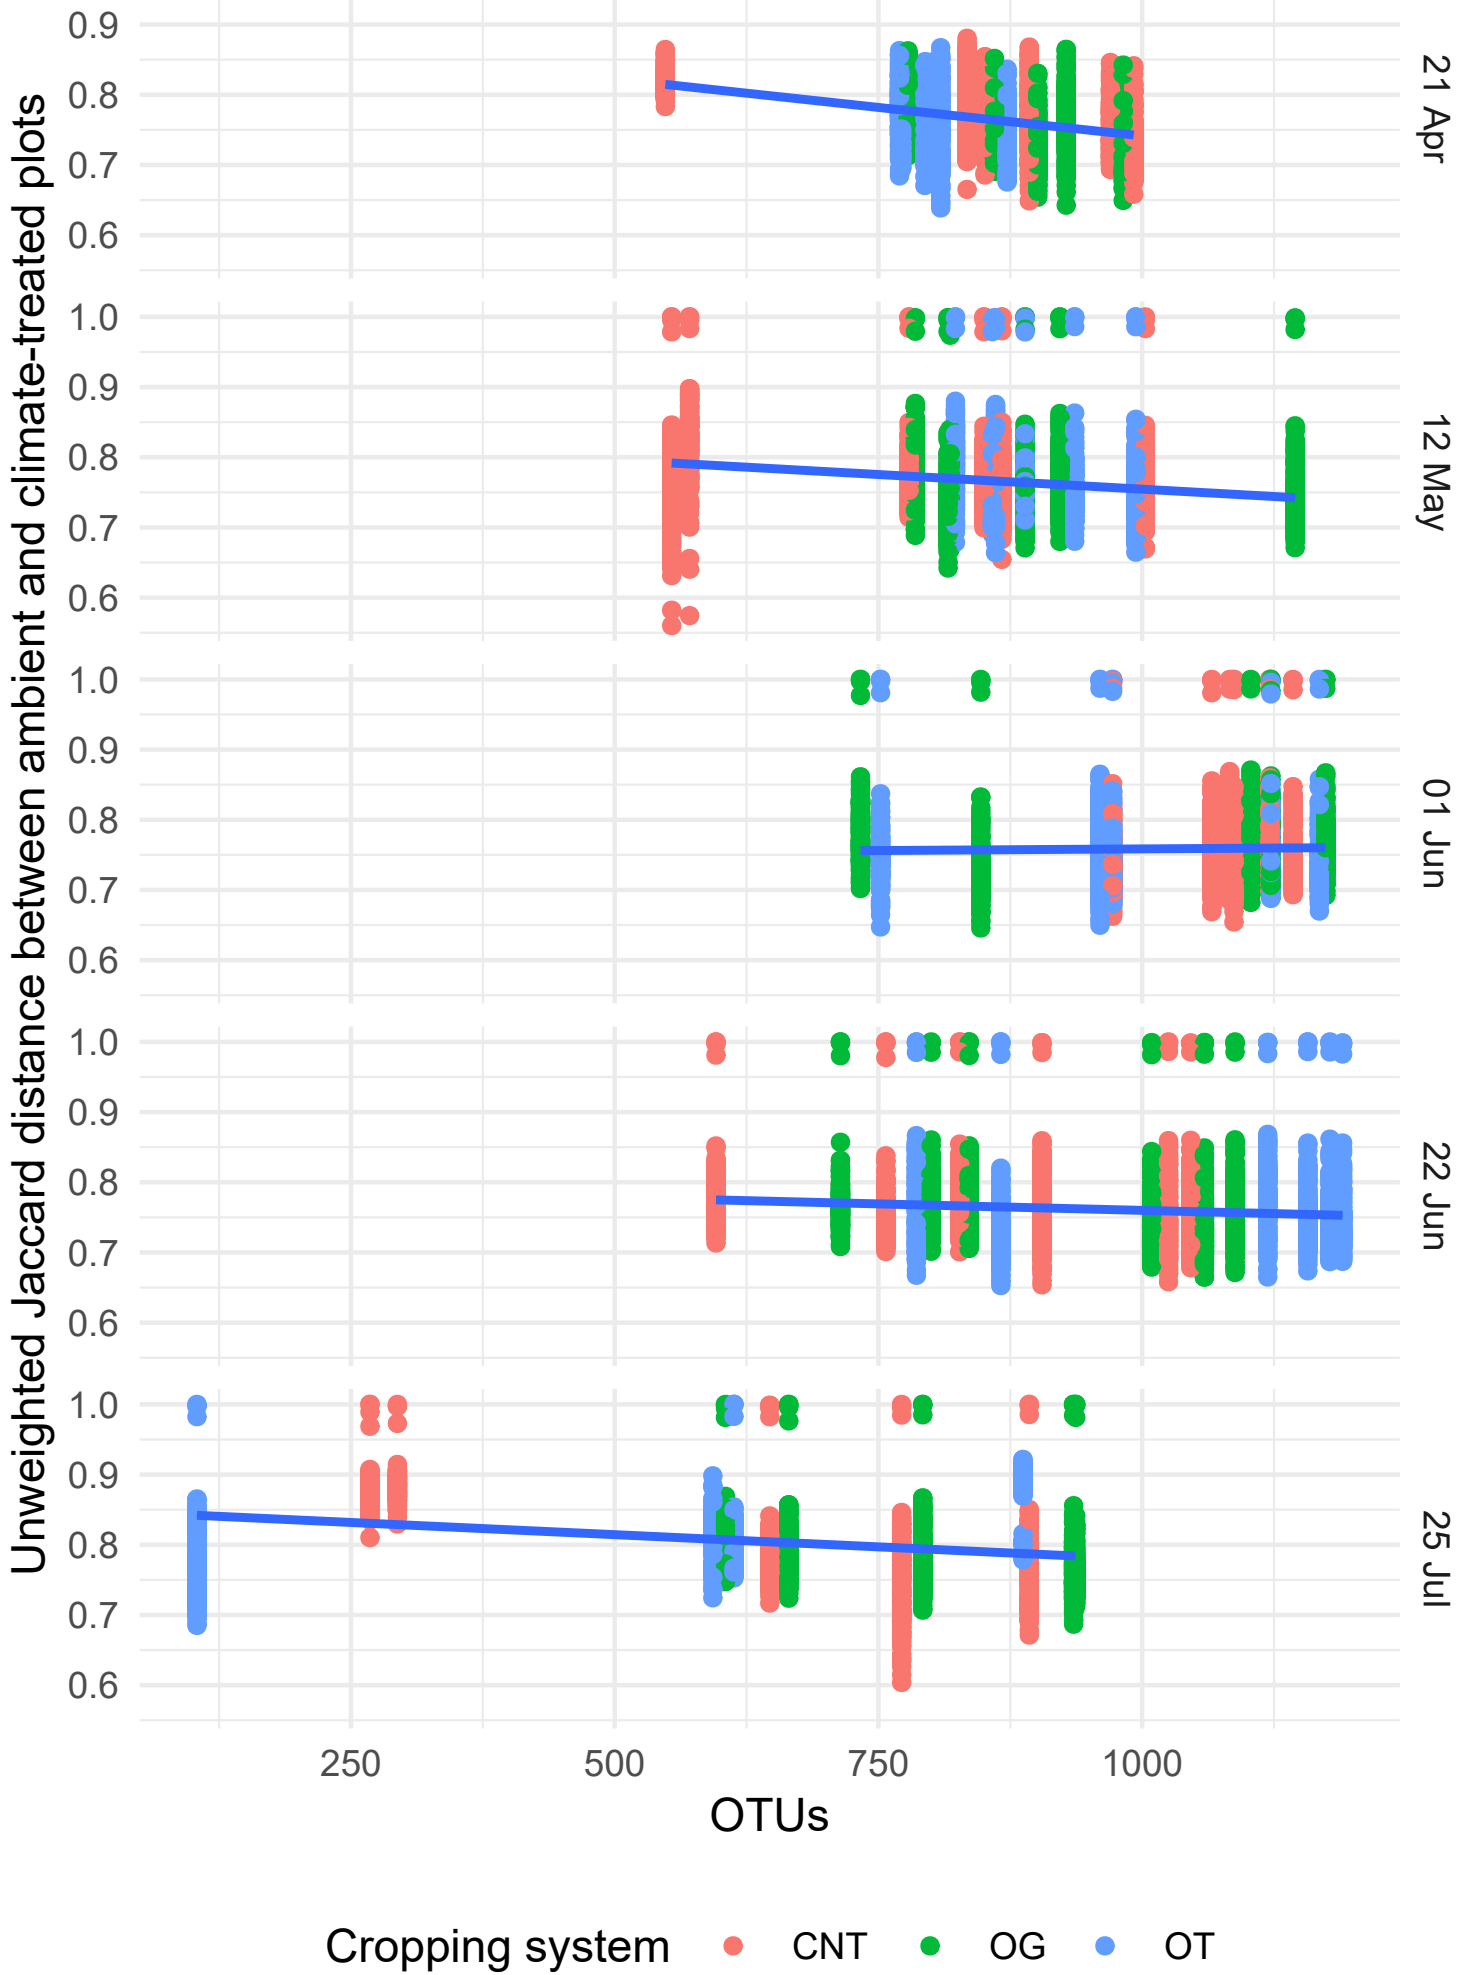

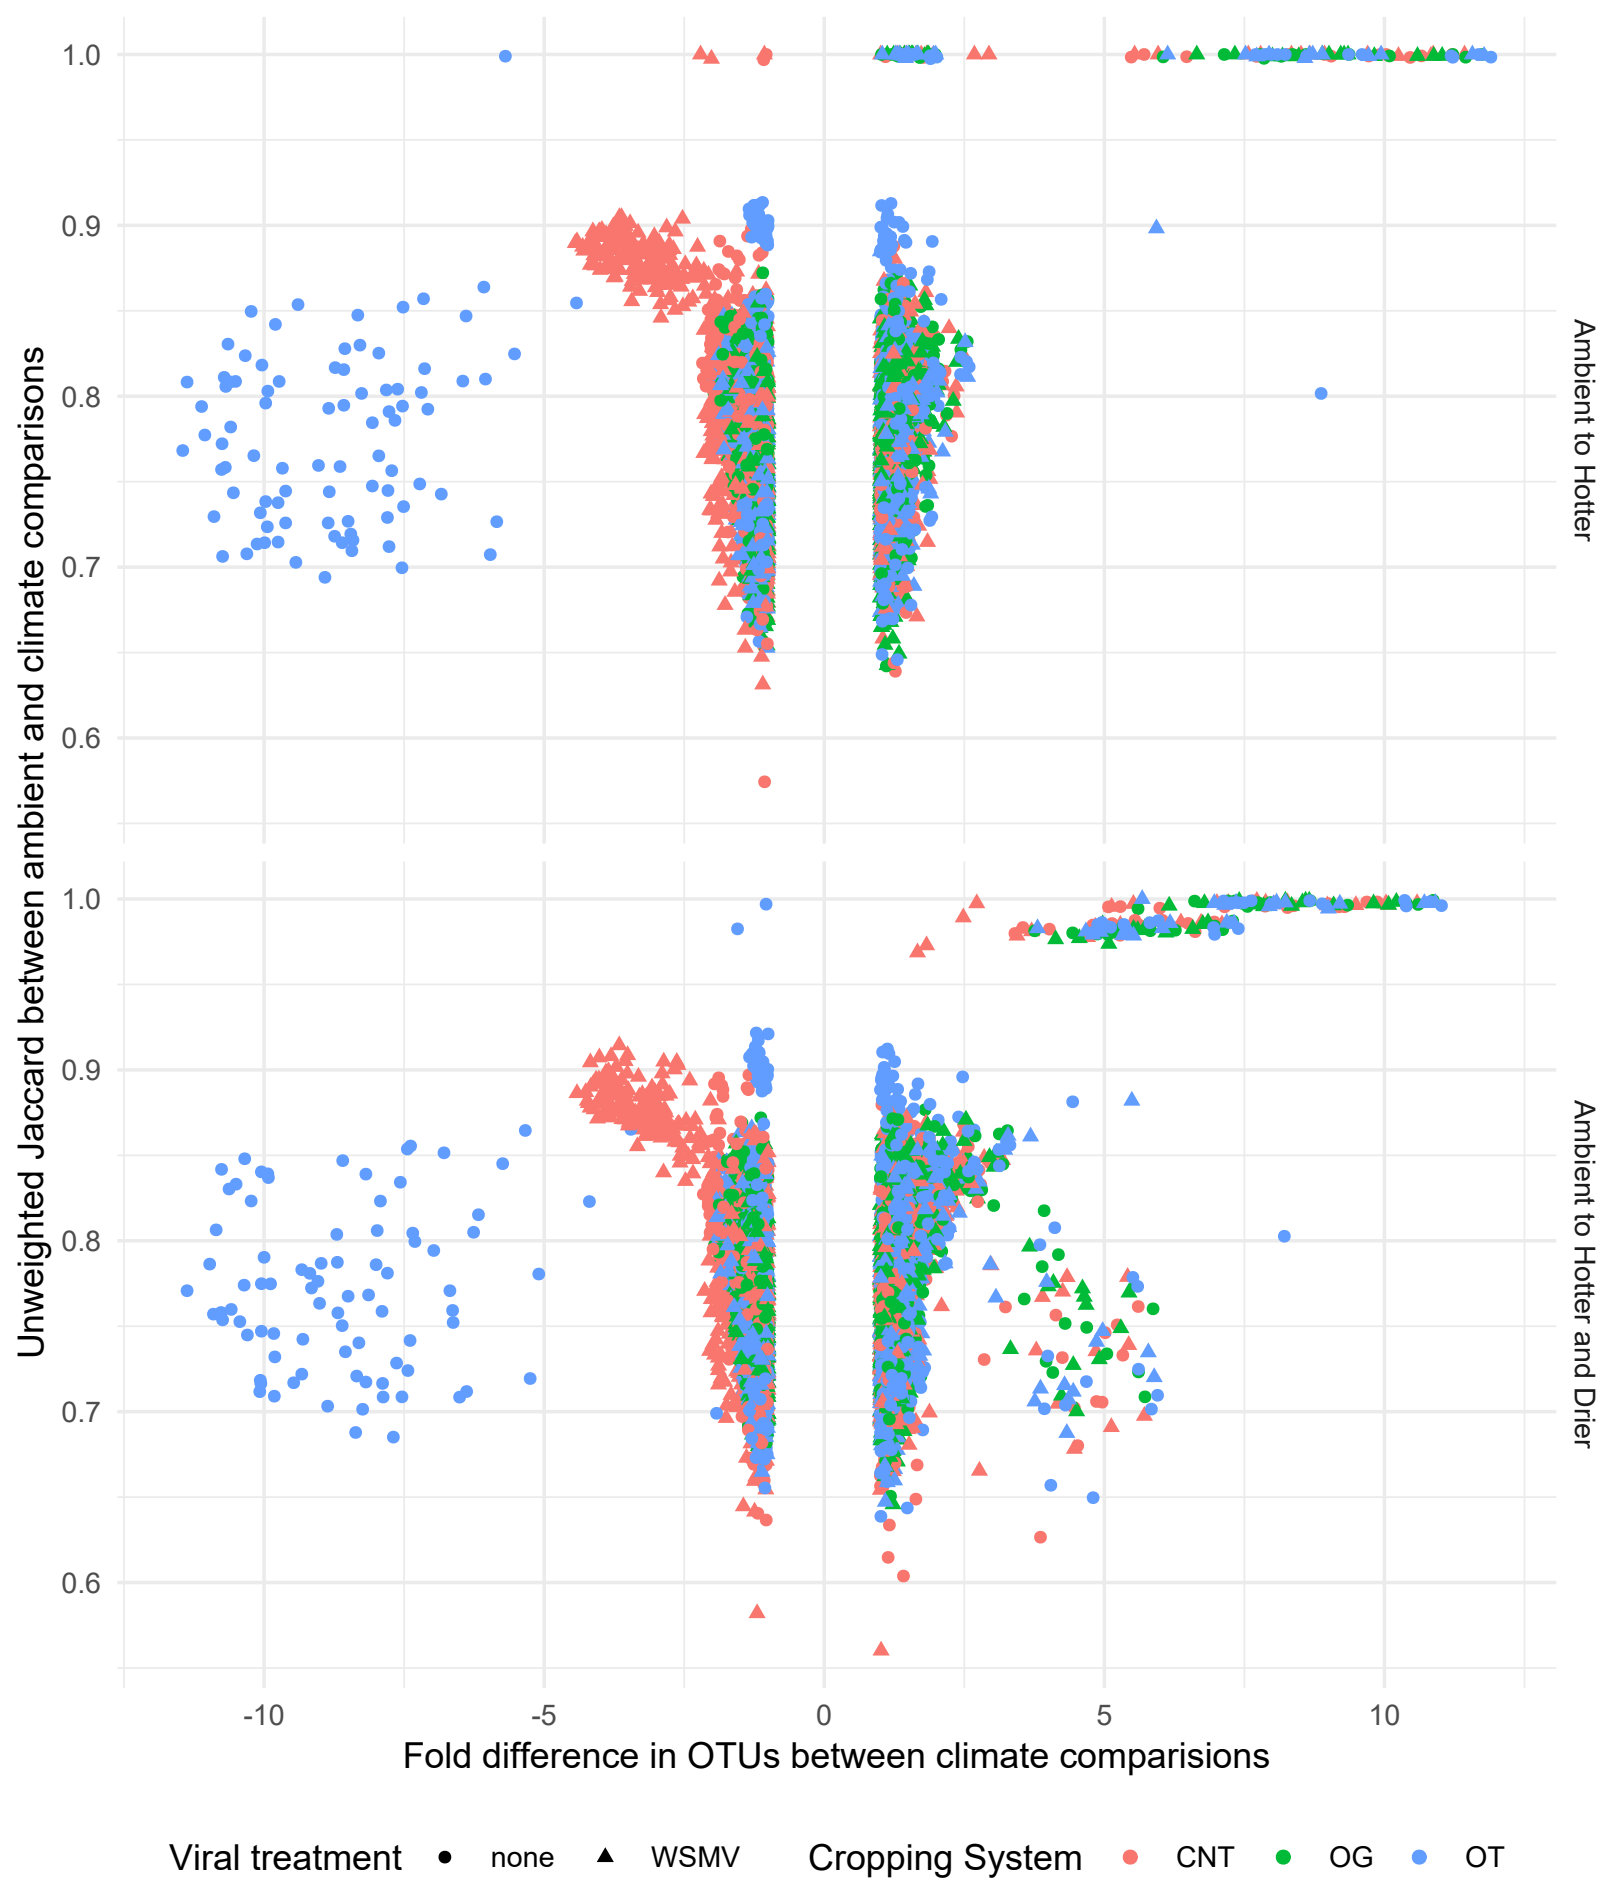

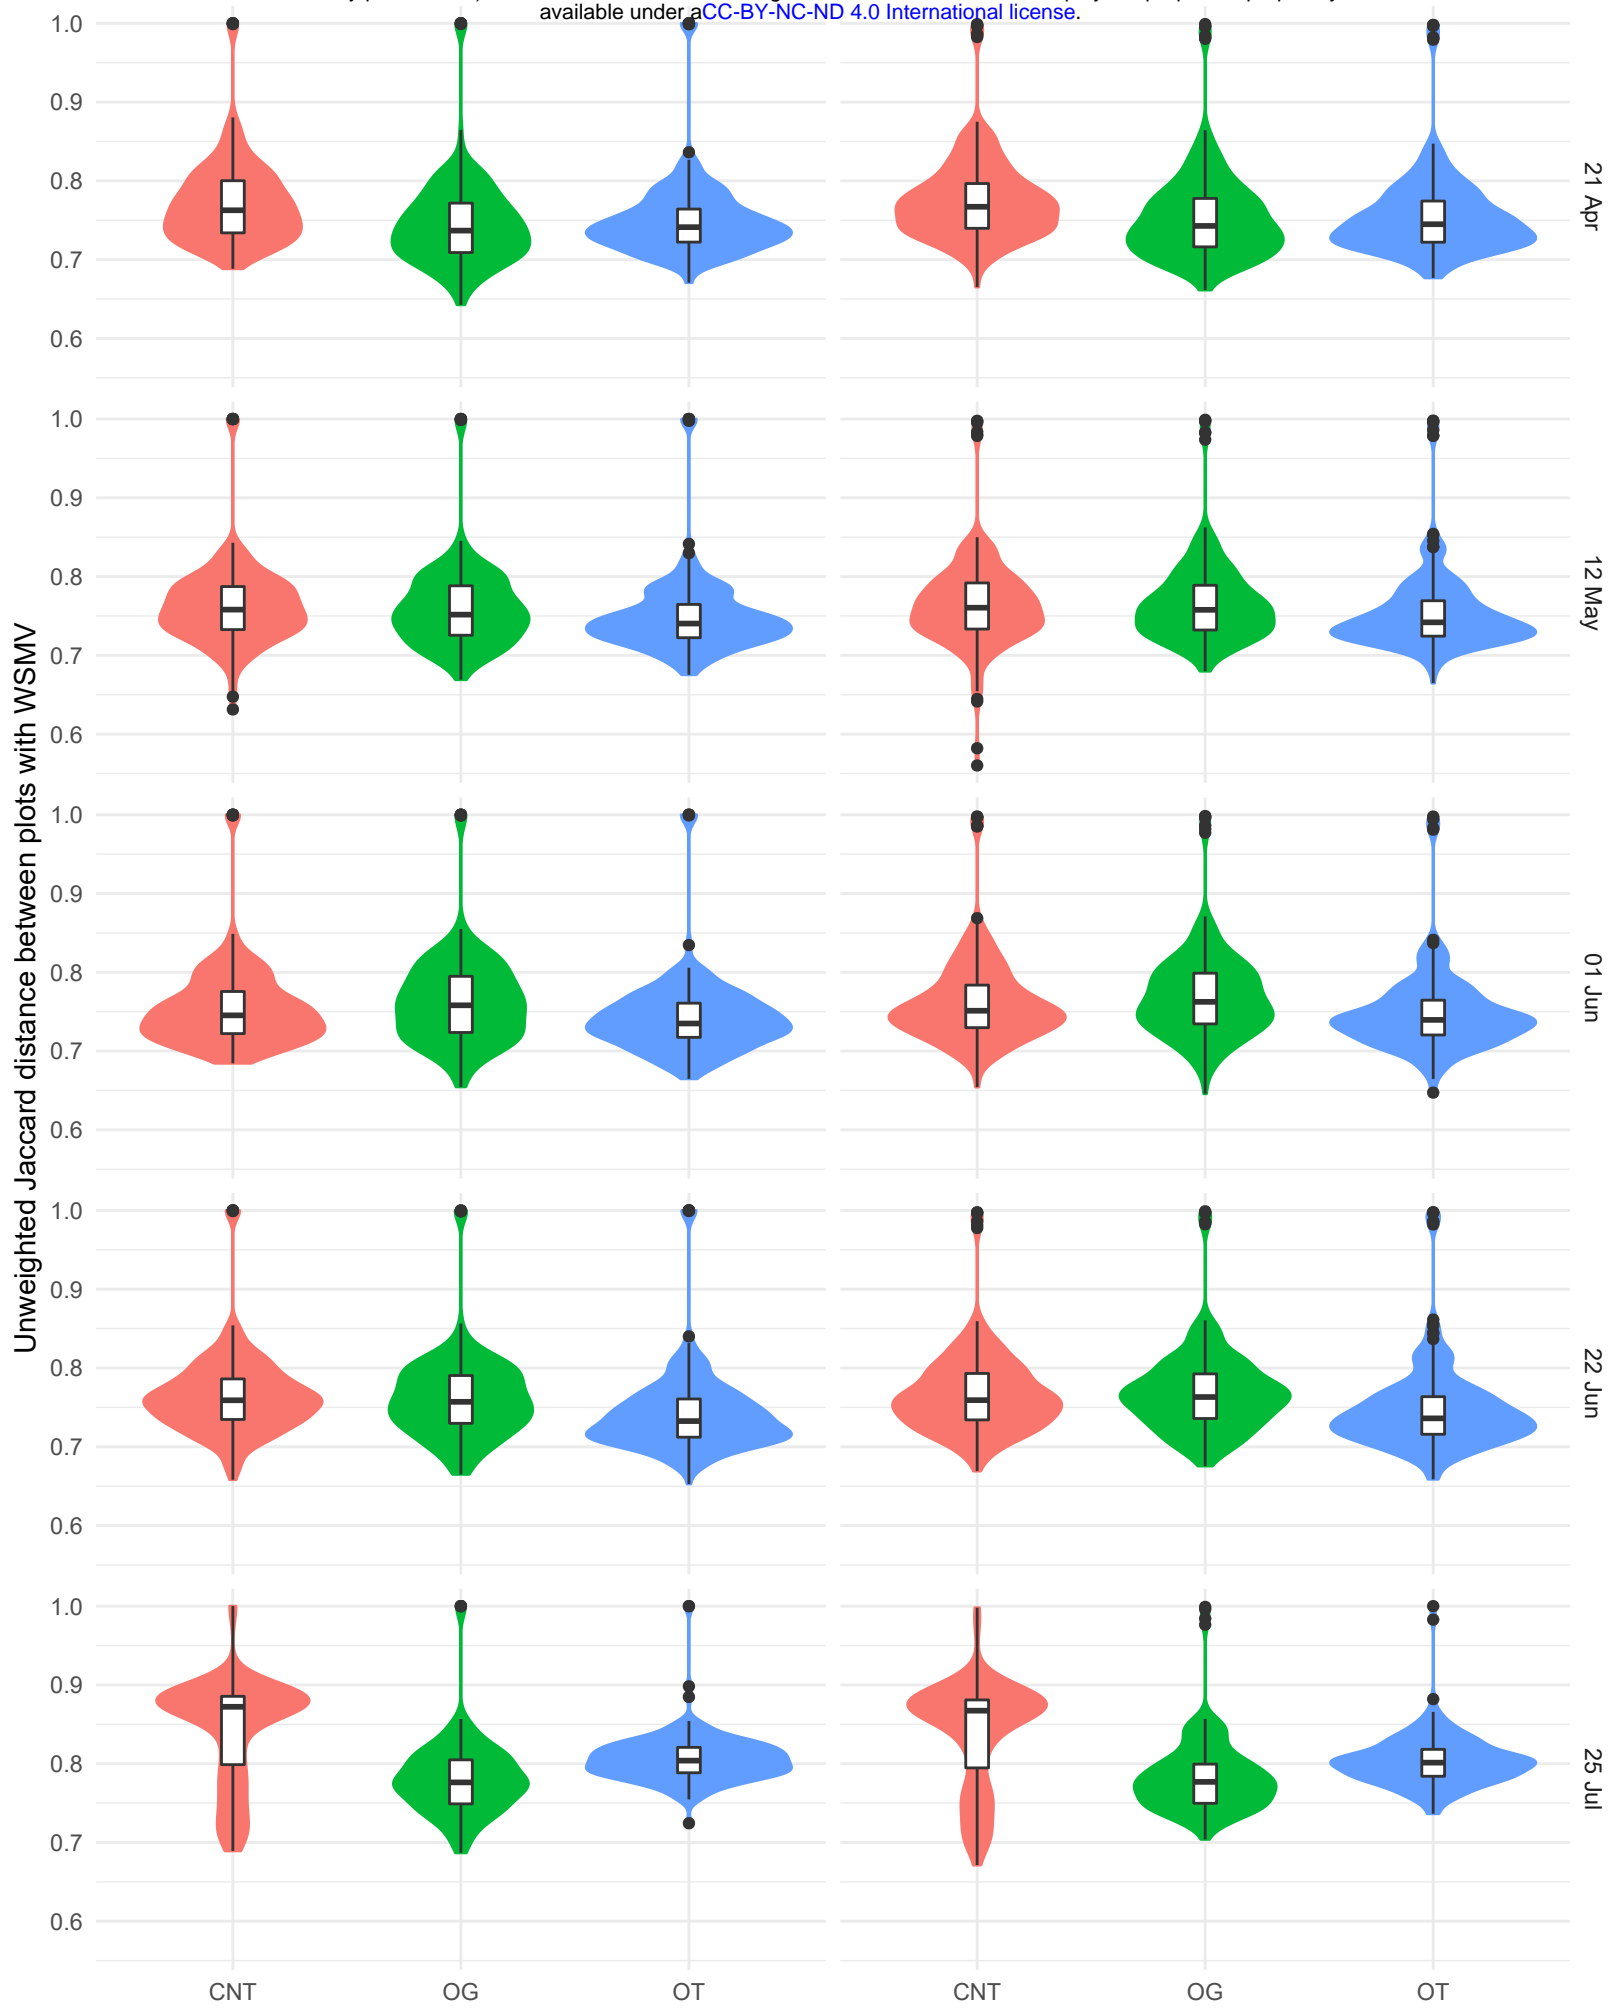

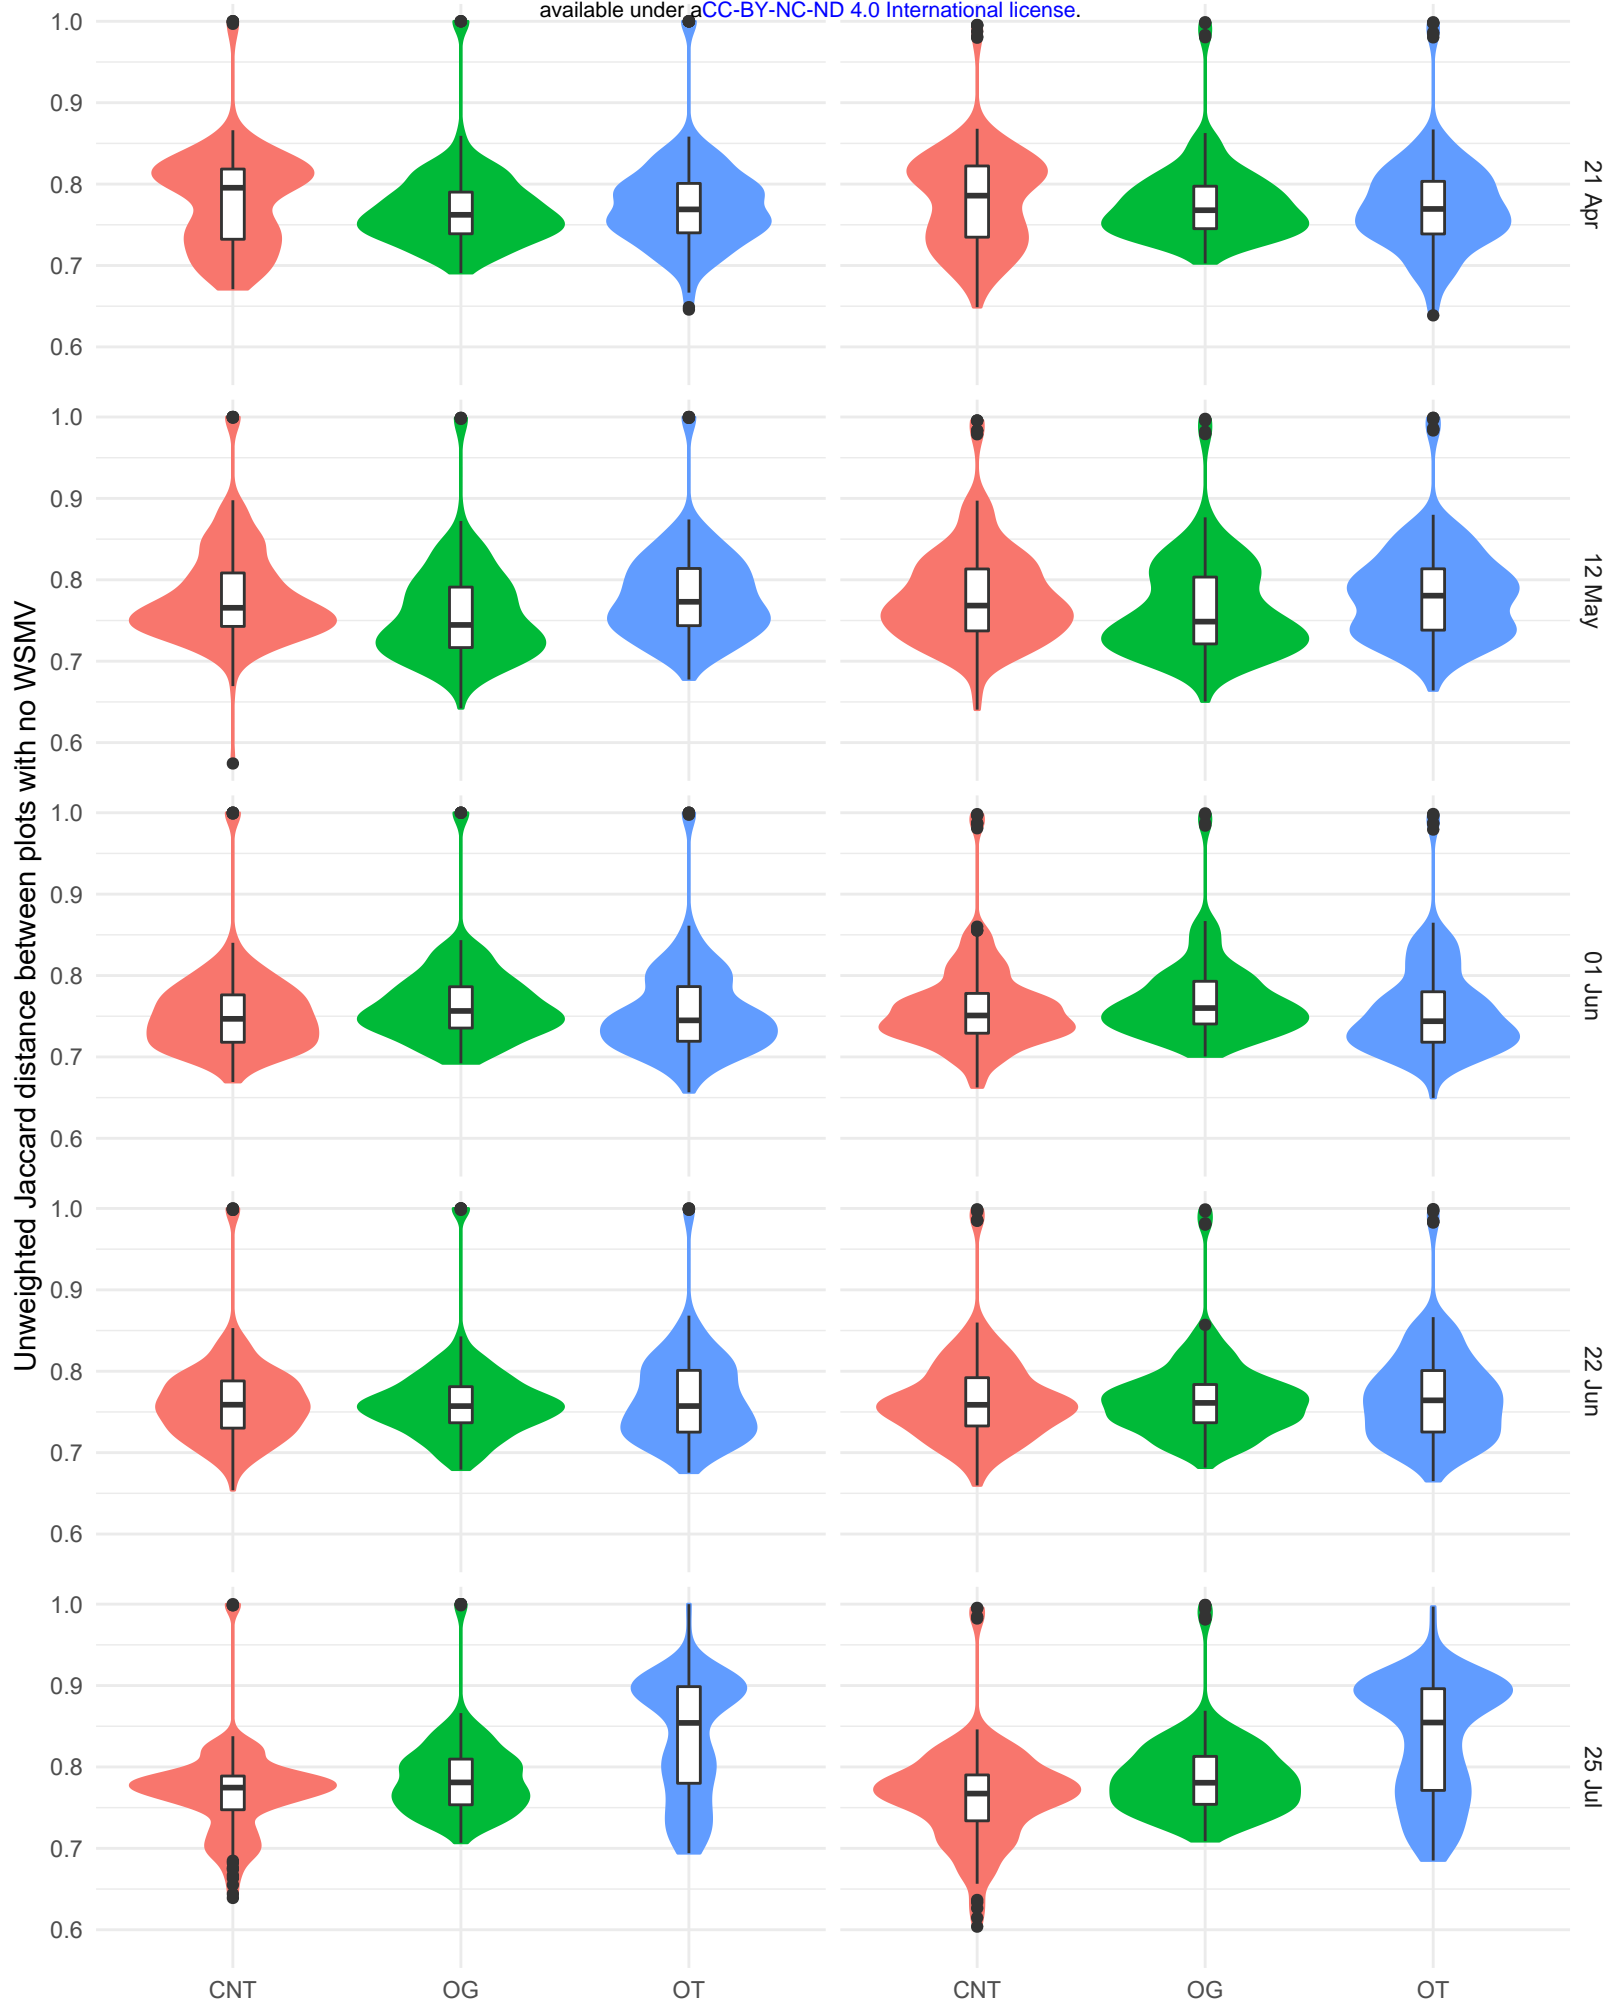

Source: https://www.biorxiv.org/content/10.1101/2020.04.13.040253v1.full.pdf
